# Supplementary material for: Integrated 16S rRNA sequencing and metabolomics analysis to investigate the antidepressant role of Yang-Xin-Jie-Yu decoction on microbe-gut-metabolite in chronic unpredictable mild stress-induced depression rat model
Source: Front Pharmacol. 2022 Sep 30;13:972351. doi: 10.3389/fphar.2022.972351 (PMC9565485; doi:10.3389/fphar.2022.972351)
Supplement: Supplementary file 1 [file DataSheet2.XLS]

## Sheet: Table S1
Number of rats	group	Immobility time in forced swimming test（s）		Open field test（time）				Sugar preference test
				before/after modeling		before/after modeling
				horizonal moving		vertical moving
		before modeling	after modeling					sucrose preference (%)
3	Controlgroup	111.67	64.07	80	5	241	13	78.2609
5	Control group	90.2	45.1	64	3	107	6	83.3333
6	Control group	181.43	58.1	23	1	44	2	36.9565
8	Control group	113.37	106.36	353	9	180	3	84.3972
23	Control group	68.72	77.33	21	4	21	1	39.0476
43	Control group	59.04	50.92	26	1	12	0	35.3982
57	Control group	58.92	60.23	200	3	433	14	31.1321
65	Control group	94.58	60.34	34	2	605	13	52.1127
72	Control group	87.51	102.57	495	28	555	23	47.6923
76	Control group	73.52	78.24	63	5	739	31	88.8889
79	Control group	98.72	48.15	385	12	60	0	86.8421
85	Control group	53.99	60.01	35	3	71	4	84.7059
87	Control group	79.97	83.31	509	23	780	28	67.4847
88	Control group	76.32	68.17	361	16	366	9	81.5315
13	Model group	70.19	120.97	798	42	113	7	76.9912
15	Model group	17.88	81.54	573	21	32	1	46.6258
24	Model group	81.33	74.69	45	9	46	1	62.2951
30	Model group	32.28	153.81	419	21	120	2	82.6531
32	Model group	59.32	117.7	433	26	486	24	34.6491
38	Model group	103.33	145.05	141	7	230	1	57.8947
54	Model group	95.46	120.2	97	10	74	5	83.4951
56	Model group	54.63	121.9	41	4	277	14	70.4225
59	Model group	16.06	123.12	348	27	170	17	88.9655
63	Model group	51.34	160.3	540	26	198	3	53.7975
68	Model group	63.42	120.21	162	3	265	13	48.9362
70	Model group	58.52	136.16	176	10			84.5588
77	Model group	40.67	144.17	221	16	20	2	51.9608
82	Model group	11.26	145	35	2	180	25	67.5
4	Positive control group	140.9	92.41	70	9	720	25	78.3333
7	Positive control group	205.2	122.66	395	25	134	6	46.8085
9	Positive control group	42.94	60.24	17	1	878	35	89.6296
17	Positive control group	35.9	42.2	45	5	723	28	72.1854
28	Positive control group	55.05	60.34	16	0	617	23	81.25
31	Positive control group	80.61	62.29	606	25	106	5	71.0526
35	Positive control group	22.91	120.18	649	40	772	39	90.5213
39	Positive control group	80.44	120.21	236	7	748	27	85.119
91	Positive control group	6.53	31.45	23	3	132	4	70.5128
52	Positive control group	106.15	90.6	90	3	10	0	85.1485
62	Positive control group	11.88	30.51	638	19	26	2	73.6
86	Positive control group	34.63	36.6	316	23	396	23	62.963
89	Positive control group	107.24	112.29	380	15	25	7	92.093
2	YXJYD low-dose	22.18	26.13	309	17	10	1	41.8301
11	YXJYD low-dose	129.02	115.23	18	3	38	4	57.6642
14	YXJYD low-dose	112.77	118.83	15	0	260	10	42.9448
21	YXJYD low-dose	65.19	34.44	623	18	515	14	51.1628
22	YXJYD low-dose	41.9	42.12	40	8	319	25	87.0588
29	YXJYD low-dose	27.32	23.3	120	10	570	27	70.3704
33	YXJYD low-dose	39.97	95.62	94	7	23	3	57.2581
49	YXJYD low-dose	123.8	34.89	102	11	80	2	40.3846
67	YXJYD low-dose	92.54	64.27	498	22	20	0	51.7544
69	YXJYD low-dose	20.49	32.11	100	5	375	15	88.1657
81	YXJYD low-dose	77.97	70.35	26	6	32	1	60.2094
90	YXJYD low-dose	50.01	52.26	19	6	310	21	63.3987
18	YXJYD medium-dose	110.79	46.51	14	5	100	6	11.3636
45	YXJYD medium-dose	128.41	33.34	99	5	280	10	80
46	YXJYD medium-dose	52.02	49.87	402	16	4	20	2.5641
64	YXJYD medium-dose	32.62	40.34	323	17	15	4	62.8931
66	YXJYD medium-dose	57.56	76.43	25	7	95	5	43.3962
74	YXJYD medium-dose	165.21	118.33	428	15	36	1	34.2657
80	YXJYD medium-dose	16.75	33.5	221	16	40	5	79.3103
83	YXJYD medium-dose	23.92	29.93	182	9	270	20	73.5632
1	YXJYD high-dose	21.28	28.3	84	2	422	3	70.4167
10	YXJYD high-dose	191.83	84.18	149	9	214	13	53.202
19	YXJYD high-dose	62.27	34.67	412	48	669	15	73.5043
34	YXJYD high-dose	34.98	61.18	172	9	20	1	73.6842
36	YXJYD high-dose	170.61	39.87	185	15	3	0	50
41	YXJYD high-dose	58.55	44.56	430	31	473	17	52.9851
44	YXJYD high-dose	19.45	34.63	541	41	16	2	79.6053
50	YXJYD high-dose	113.19	40.17	282	14	36	3	79.2929
53	YXJYD high-dose	125.56	74.91	303	7	25	0	78.7879
58	YXJYD high-dose	120.2	124.4	581	28	20	1	72.561
60	YXJYD high-dose	89.73	60.29	15	0	605	22	59.3301
71	YXJYD high-dose	163.68	66.57	25	4	30	5	61.194
84	YXJYD high-dose	27.42	35.5	20	11	23	7	69.4444

## Sheet: Table S2
Estimators		ace	chao	coverage	shannon	simpson	sobs
Control group	Mean	540.92	545.91	0.99818	3.275	0.11198	457.62
	Sd	54.624	54.82	0.00018364	0.42188	0.033769	48.668
Model group	Mean	264.88	272.02	0.99907	3.0018	0.10361	219.75
	Sd	57.289	62.472	0.00028909	0.39522	0.040394	43.044
Treatment group	Mean	540.29	544.53	0.99813	3.7697	0.07568	457.5
	Sd	54.971	55.984	0.00022932	0.41007	0.030916	53.833
Control group/Model group	Pvalue	0.0009391	0.0009391	0.0009391	0.1563	0.7132	0.0009391
	Qvalue	0.001409	0.001409	0.001409	0.1875	0.7132	0.001409
Treatment group/Model group	Pvalue	0.0009391	0.0009391	0.0009391	0.002762	0.372	0.0009391
	Qvalue	0.001409	0.001409	0.001409	0.003314	0.372	0.001409
Treatment group/Control group	Pvalue	0.7132	0.7929	0.4948	0.06608	0.1036	0.8335
	Qvalue	0.8335	0.8335	0.8335	0.3107	0.3107	0.8335

## Sheet: Table S3
Grouping	Genus name	group	Mean	LDA_value	Pvalue
Model/YXJYD treatment	g__Monoglobus	Treatment_group	4.40157	4.09497	0.000750046
	g__Desulfovibrio	Treatment_group	4.71431	4.42076	0.00113133
	g__Romboutsia	Treatment_group	5.1425	4.50215	0.0208626
	g__Parabacteroides	Model_group	4.45809	4.11016	0.00454464
	g__Bilophila	Treatment_group	1.35942	4.00701	0.000677317
	g__unclassified_f__Lachnospiraceae	Treatment_group	4.66189	4.30273	0.00077753
	g__norank_f__Muribaculaceae	Model_group	5.33932	5.00378	0.0117187
	g__Bacteroides	Model_group	4.72121	4.41151	0.00113133
	g__Escherichia-Shigella	Model_group	5.26955	4.92283	0.00077753
	g__Ruminococcus_torques_group	Treatment_group	4.29044	4.01484	0.0016163
	g__Lachnospiraceae_NK4A136_group	Treatment_group	4.3379	4.01916	0.0016163
	g__Ruminococcus_gnavus_group	Model_group	4.39956	4.08946	0.0459994
	g__norank_f__norank_o__Clostridia_UCG-014	Treatment_group	4.82659	4.53286	0.000750046

## Sheet: Table S4
Genus	Mean Decrease Accuracy
g__Monoglobus	3.83188
g__norank_f__norank_o__Clostridia_UCG.014	3.78007
g__Candidatus_Saccharimonas	3.70525
g__Lachnospiraceae_NK4A136_group	3.53849
g__NK4A214_group	3.51178
g__Christensenellaceae_R.7_group	3.33229
g__Parabacteroides	3.25466
g__Coriobacteriaceae_UCG.002	2.99537
g__Bifidobacterium	2.92011
g__Bacteroides	2.6845
g__Enterorhabdus	2.66184
g__Dorea	2.62343
g__norank_f__Lachnospiraceae	2.57442
g__norank_f__Eubacterium_coprostanoligenes_group	2.41063
g__Clostridium_sensu_stricto_1	2.18772
g__UCG.005	1.98696
g__norank_f__UCG.010	1.9682
g__Ruminococcus_torques_group	1.91968
g__norank_f__norank_o__RF39	1.91705
g__Blautia	1.88496
g__Lachnoclostridium	1.86802
g__unclassified_k__norank_d__Bacteria	1.73048
g__norank_f__Muribaculaceae	1.72702
g__Lactobacillus	1.69592
g__Klebsiella	1.65958
g__Ruminococcus	1.64421
g__Escherichia.Shigella	1.45371
g__Rothia	1.41705
g__Alloprevotella	1.40835
g__Candidatus_Stoquefichus	1.40835
g__norank_f__Oscillospiraceae	1.37458
g__Leptotrichia	1.21447
g__Enterococcus	1.14608
g__Corynebacterium	1.001
g__Collinsella	1.001
g__norank_f__norank_o__Coriobacteriales	1.001
g__unclassified_f__Prevotellaceae	1.001
g__Helicobacter	1.001
g__Desulfovibrio	1.001
g__Elusimicrobium	1.001
g__Clostridium_innocuum_group	1.001
g__norank_f__Erysipelotrichaceae	1.001
g__Globicatella	1.001
g__ASF356	1.001
g__Acetatifactor	1.001
g__Lachnospiraceae_UCG.006	1.001
g__Roseburia	1.001
g__Tuzzerella	1.001
g__unclassified_f__Lachnospiraceae	1.001
g__Colidextribacter	1.001
g__Anaerotruncus	1.001
g__Candidatus_Soleaferrea	1.001
g__Harryflintia	1.001
g__Anaerovorax	1.001
g__Eubacterium_nodatum_group	1.001
g__norank_f__norank_o__norank_c__Clostridia	1.001
g__unclassified_c__Clostridia	1.001
g__Quinella	1.001
g__Veillonella	1.001
g__Neisseria	1.001
g__Ruminococcus_gnavus_group	0.853424
g__Prevotella	0.711102
g__Actinomyces	0
g__norank_f__Coriobacteriales_Incertae_Sedis	0
g__Adlercreutzia	0
g__DNF00809	0
g__Gordonibacter	0
g__Parvibacter	0
g__norank_f__Eggerthellaceae	0
g__unclassified_o__Coriobacteriales	0
g__Barnesiella	0
g__unclassified_f__Barnesiellaceae	0
g__Butyricimonas	0
g__Odoribacter	0
g__Porphyromonas	0
g__Prevotellaceae_Ga6A1_group	0
g__Prevotellaceae_UCG.001	0
g__Rikenellaceae_RC9_gut_group	0
g__Capnocytophaga	0
g__norank_f__norank_o__Chloroplast	0
g__norank_f__Desulfovibrionaceae	0
g__Anaeroplasma	0
g__Erysipelatoclostridium	0
g__Allobaculum	0
g__Dubosiella	0
g__Faecalibaculum	0
g__Turicibacter	0
g__Aerococcus	0
g__Streptococcus	0
g__unclassified_o__Lactobacillales	0
g__Mycoplasma	0
g__Jeotgalicoccus	0
g__Staphylococcus	0
g__norank_f__Christensenellaceae	0
g__unclassified_f__Christensenellaceae	0
g__norank_f__norank_o__Clostridia_vadinBB60_group	0
g__Candidatus_Arthromitus	0
g__Anaerofustis	0
g__Defluviitaleaceae_UCG.011	0
g__Anaerostipes	0
g__Eubacterium_ventriosum_group	0
g__Eubacterium_xylanophilum_group	0
g__GCA.900066575	0
g__Lachnospira	0
g__Lachnospiraceae_FCS020_group	0
g__Lachnospiraceae_UCG.001	0
g__Marvinbryantia	0
g__Butyricicoccus	0
g__UCG.009	0
g__Oscillibacter	0
g__Papillibacter	0
g__UCG.003	0
g__unclassified_f__Oscillospiraceae	0
g__Paludicola	0
g__Pygmaiobacter	0
g__UBA1819	0
g__unclassified_o__Oscillospirales	0
g__Peptococcus	0
g__norank_f__Peptococcaceae	0
g__Eubacterium_brachy_group	0
g__Family_XIII_AD3011_group	0
g__Family_XIII_UCG.001	0
g__Clostridioides	0
g__Romboutsia	0
g__unclassified_o__Peptostreptococcales.Tissierellales	0
g__norank_f__norank_o__Rhodospirillales	0
g__Lautropia	0
g__Parasutterella	0
g__Morganella	0
g__Rodentibacter	0
g__Acinetobacter	0
g__Treponema	0
g__unclassified_f__Ruminococcaceae	-0.128039
g__unclassified_f__Eggerthellaceae	-1.001
g__Prevotellaceae_NK3B31_group	-1.001
g__Alistipes	-1.001
g__norank_f__norank_o__Gastranaerophilales	-1.001
g__Granulicatella	-1.001
g__Gemella	-1.001
g__A2	-1.001
g__Acetitomaculum	-1.001
g__Lachnospiraceae_NC2004_group	-1.001
g__Eubacterium_siraeum_group	-1.001
g__Fournierella	-1.001
g__norank_f__Ruminococcaceae	-1.30207
g__Bacteroides_pectinophilus_group	-1.38943

## Sheet: Table S5
	OFT-horizonal	OFT-vertical	FST-immobile time	SPT	Weight
g__Lactobacillus	0.1637	-0.13198	-0.18972	0.26736	0.39822
g__Romboutsia	0.23046	0.0258	-0.24704	0.09291	0.2747
g__norank_f__Muribaculaceae	0.01434	-0.03126	0.45455	-0.23326	-0.58992
g__Escherichia-Shigella	0.01657	-0.31985	0.57129	-0.13495	-0.57672
g__norank_f__norank_o__Clostridia_UCG-014	-0.05374	0.26186	-0.47749	-0.00643	0.5235
g__Desulfovibrio	-0.1815	0.14289	-0.72826	0.23326	0.49605
g__UCG-005	0.0329	0.26707	-0.50272	0.02423	0.37222
g__Bifidobacterium	0.17557	-0.24808	0.34684	-0.20311	-0.59585
g__unclassified_f__Lachnospiraceae	-0.18991	0.1677	-0.64921	-0.05288	0.38043
g__Monoglobus	-0.04839	0.33284	-0.62073	0.20258	0.58255
g__Bacteroides	0.14133	-0.13607	0.56329	-0.34564	-0.76493
g__Streptococcus	-0.28692	-0.01489	-0.37064	-0.01038	0.10625
g__Lachnospiraceae_NK4A136_group	-0.09349	0.1407	-0.6217	0.08947	0.49073
g__Parabacteroides	-0.03069	-0.22478	0.44169	-0.29096	-0.68447
g__Enterorhabdus	-0.08259	0.1027	-0.44763	0.16753	0.41206
g__Christensenellaceae_R-7_group	-0.07724	0.3019	-0.6173	-0.10274	0.49404
g__Ruminococcus_gnavus_group	-0.27005	0.57462	-0.30811	0.11749	0.35806
g__norank_f__Lachnospiraceae	-0.07765	0.24808	-0.58597	0.17791	0.42292
g__norank_f__norank_o__RF39	-0.12208	0.40559	-0.47641	0.14659	0.64631
g__Ruminococcus_torques_group	-0.08436	0.01191	-0.51903	-0.0309	0.22046

## Sheet: Table S6
	L-Isoleucine	Succinic acid	1-Methylhistidine	2-Furoylglycine	2-Octenoic acid	dihydroxyacetone	Hippuric acid	L-Malic acid	Melatonin	proglutamate	Taurine	Caprylic acid	Cysteine-S-sulfate	Succinylacetone
g__Lactobacillus	0.54051	-0.28458	-0.3666	-0.46553	0.0247	-0.4002	0.09486	-0.41304	0.02075	-0.20064	-0.22189	-0.52152	-0.47245	-0.51087
g__Romboutsia	0.29743	-0.22134	-0.20751	-0.1621	0.12648	0.08498	0.49506	-0.12549	0.17984	0.28861	-0.36916	-0.30332	-0.23622	-0.08004
g__norank_f__Muribaculaceae	-0.64822	0.583	0.5247	0.54806	-0.22431	0.42292	-0.41304	0.47925	-0.05138	0.14233	0.49864	0.5235	0.67359	0.66008
g__Escherichia-Shigella	-0.76798	0.70521	0.69385	0.71824	-0.14579	0.6637	-0.55004	0.68594	-0.12701	-0.15571	0.65942	0.35486	0.60133	0.5876
g__norank_f__norank_o__Clostridia_UCG-014	0.69471	-0.66155	-0.73528	-0.63549	-0.14003	-0.61059	0.63632	-0.57546	0.22118	0.20713	-0.71839	-0.23266	-0.5761	-0.49579
g__Desulfovibrio	0.56028	-0.58597	-0.70949	-0.71609	-0.26877	-0.4664	0.61957	-0.5	-0.1166	0.26785	-0.82679	-0.10985	-0.4507	-0.43874
g__UCG-005	0.58033	-0.57884	-0.5912	-0.65142	-0.16214	-0.522	0.38655	-0.50618	0.34157	0.02472	-0.46403	-0.0495	-0.32682	-0.34108
g__Bifidobacterium	-0.64229	0.55237	0.53162	0.63405	-0.13636	0.5583	-0.25889	0.56028	-0.15613	0.21201	0.43341	0.09946	0.24215	0.45158
g__unclassified_f__Lachnospiraceae	0.51482	-0.61067	-0.61265	-0.62713	-0.28063	-0.44862	0.64526	-0.47431	0.12648	0.27971	-0.77885	-0.11875	-0.42155	-0.36462
g__Monoglobus	0.74963	-0.73724	-0.75955	-0.77759	-0.08676	-0.60883	0.54438	-0.6004	0.28508	0.03769	-0.68709	-0.09583	-0.53658	-0.56669
g__Bacteroides	-0.8006	0.74808	0.72232	0.70615	-0.14863	0.61333	-0.47758	0.70696	-0.2165	0.05501	0.61348	0.42372	0.63206	0.70746
g__Streptococcus	0.42451	-0.22288	-0.31974	-0.391	0.07116	-0.06375	0.38547	-0.26538	-0.32073	0.19674	-0.30994	-0.04058	-0.06253	0.04102
g__Lachnospiraceae_NK4A136_group	0.65036	-0.66914	-0.74376	-0.75803	-0.1789	-0.71905	0.52137	-0.68298	0.0682	0.16362	-0.82477	-0.22915	-0.55264	-0.51396
g__Parabacteroides	-0.75925	0.63362	0.65706	0.6263	-0.24577	0.59025	-0.41378	0.66055	-0.21536	0.11643	0.53704	0.4094	0.63079	0.66304
g__Enterorhabdus	0.8083	-0.39229	-0.72134	-0.68742	-0.17194	-0.57806	0.46047	-0.63636	-0.00692	0.13195	-0.5194	-0.04107	-0.2125	-0.30731
g__Christensenellaceae_R-7_group	0.62531	-0.68343	-0.69446	-0.60041	-0.17437	-0.54514	0.72151	-0.4289	0.26255	0.29269	-0.67358	0.00652	-0.46158	-0.40585
g__Ruminococcus_gnavus_group	0.55737	-0.48912	-0.55638	-0.55998	-0.10732	-0.58309	0.27547	-0.53116	0.2087	-0.08335	-0.46945	-0.08148	-0.3438	-0.45401
g__norank_f__Lachnospiraceae	0.65217	-0.57115	-0.71838	-0.76748	-0.13043	-0.66008	0.33992	-0.68676	0.08004	-0.05288	-0.67062	-0.12815	-0.38695	-0.43281
g__norank_f__norank_o__RF39	0.80726	-0.73026	-0.80577	-0.71107	0.03974	-0.73374	0.50969	-0.68506	0.12221	-0.04621	-0.61367	-0.23284	-0.61119	-0.65426
g__Ruminococcus_torques_group	0.41671	-0.56055	-0.56649	-0.50507	-0.37222	-0.43253	0.72071	-0.35788	-0.14286	0.51199	-0.75748	-0.37525	-0.53844	-0.42066

## Sheet: Table S7
			group	control	control	control	control	control	control	control	control	Treatment	Treatment	Treatment	Treatment	Treatment	Treatment	Treatment	Treatment	Model	Model	Model	Model	Model	Model	Model	Model
Pathway level1	Pathway level2	Pathway level3	Description	CK3	CK5	CK72	CK76	CK79	CK8	CK87	CK88	G1	G10	G41	G50	G53	G60	G71	G84	M13	M15	M30	M59	M63	M68	M77	M82
Metabolism	Carbohydrate metabolism	ko00010	Glycolysis / Gluconeogenesis	0.0199101	0.0198286	0.0197423	0.0198214	0.019602	0.0195663	0.0199124	0.0198795	0.0193841	0.0192089	0.0180116	0.0196724	0.0194834	0.0179061	0.0167783	0.019592	0.0193716	0.0189745	0.0191427	0.0190816	0.0189382	0.0194461	0.0193692	0.0194518
Metabolism	Carbohydrate metabolism	ko00020	Citrate cycle (TCA cycle)	0.00345935	0.00341276	0.00349916	0.00331049	0.00348845	0.00363839	0.00338376	0.00353243	0.00337811	0.00330195	0.00366658	0.00340141	0.00345689	0.00399917	0.00369646	0.00337237	0.00367202	0.00384254	0.00380437	0.00377826	0.00373093	0.00363668	0.00366119	0.00356195
Metabolism	Carbohydrate metabolism	ko00030	Pentose phosphate pathway	0.0132826	0.0132058	0.013253	0.0131744	0.0131604	0.013241	0.0132337	0.0133429	0.0129716	0.0127923	0.0124761	0.0131214	0.0131246	0.0128154	0.0118028	0.0130639	0.0131848	0.0132058	0.0131832	0.0131204	0.0131239	0.0131974	0.0132782	0.0131975
Metabolism	Carbohydrate metabolism	ko00040	Pentose and glucuronate interconversions	0.00461068	0.00435931	0.00462395	0.00390795	0.00477749	0.00529458	0.00425679	0.00479224	0.00451845	0.0042448	0.00593899	0.00408432	0.00451741	0.00627361	0.00649378	0.00427	0.00500539	0.0055433	0.00535725	0.00535559	0.0053842	0.00507001	0.00514246	0.00473728
Metabolism	Carbohydrate metabolism	ko00051	Fructose and mannose metabolism	0.0181184	0.0176864	0.0182579	0.0172682	0.0183397	0.0186245	0.0176593	0.0183125	0.0178965	0.017188	0.0186105	0.0172895	0.017752	0.0181488	0.017886	0.0175662	0.0184388	0.0191323	0.0187392	0.0187314	0.0183539	0.0185535	0.0187331	0.0181693
Metabolism	Carbohydrate metabolism	ko00052	Galactose metabolism	0.0154331	0.0153067	0.0153833	0.0153113	0.0155685	0.015149	0.0153511	0.0152758	0.0156447	0.0154147	0.0152135	0.0151761	0.0151399	0.0132828	0.0146195	0.0154094	0.0150876	0.014917	0.0145755	0.014686	0.0144668	0.01512	0.0150845	0.0151111
Metabolism	Carbohydrate metabolism	ko00053	Ascorbate and aldarate metabolism	0.0010484	0.000903058	0.00115864	0.00065067	0.00135401	0.00147908	0.000827846	0.00109303	0.00133842	0.00120163	0.00261766	0.000801307	0.00105877	0.00199847	0.00328876	0.0010236	0.00145452	0.00184604	0.00168252	0.0017565	0.00150437	0.00148489	0.00143708	0.00121964
Metabolism	Lipid metabolism	ko00061	Fatty acid biosynthesis	0.00669818	0.00659645	0.0066637	0.00641644	0.00676783	0.00695667	0.00655145	0.00676016	0.00667739	0.00657395	0.00723395	0.00648219	0.00665274	0.00727491	0.00746178	0.00656653	0.00682848	0.00702058	0.00693389	0.00694398	0.00695805	0.00685647	0.00687934	0.00672589
Metabolism	Lipid metabolism	ko00062	Fatty acid elongation	1.51427e-05	1.52593e-05	1.58335e-05	1.41373e-05	1.63233e-05	1.80094e-05	1.45672e-05	1.58259e-05	1.61169e-05	1.64856e-05	2.37939e-05	1.56912e-05	1.64257e-05	2.72338e-05	2.91751e-05	1.55716e-05	1.90188e-05	2.12536e-05	2.18326e-05	2.22504e-05	2.06857e-05	1.86872e-05	1.83574e-05	1.75043e-05
Metabolism	Lipid metabolism	ko00071	Fatty acid degradation	0.000911324	0.000910394	0.000929441	0.0008566	0.000926784	0.00104375	0.000887181	0.000952137	0.000902439	0.000922658	0.00119863	0.000912673	0.000965704	0.00150297	0.00142799	0.000899274	0.00103496	0.00112694	0.00113442	0.00112309	0.0011752	0.00102202	0.00103436	0.00099051
Metabolism	Lipid metabolism	ko00072	Synthesis and degradation of ketone bodies	0.000569813	0.00055435	0.000562579	0.000532925	0.000582514	0.000595	0.000548925	0.000575172	0.000571195	0.000548997	0.000627064	0.000540153	0.000559645	0.000594358	0.000632653	0.0005527	0.000583011	0.000606921	0.000572862	0.000575275	0.000583302	0.000580268	0.00058934	0.000569394
Metabolism	Lipid metabolism	ko00100	Steroid biosynthesis	3.48695e-07	5.77088e-07	6.53982e-07	3.0533e-07	4.91948e-07	2.55013e-06	2.93814e-07	1.11353e-06	5.9643e-07	1.28315e-06	5.9899e-06	5.18728e-07	2.23176e-06	1.31402e-05	1.10099e-05	5.23116e-07	1.87379e-06	3.81256e-06	4.01496e-06	3.79862e-06	6.37496e-06	2.09441e-06	3.03703e-06	2.11417e-06
Metabolism	Lipid metabolism	ko00120	Primary bile acid biosynthesis	0.00139375	0.0014194	0.00135415	0.00147694	0.00129134	0.00125479	0.00144535	0.00138033	0.00127123	0.00127961	0.000823358	0.00142918	0.0013485	0.00095412	0.000525781	0.00136509	0.00124331	0.00111282	0.00113149	0.00110735	0.00118409	0.00123021	0.0012484	0.00130595
Metabolism	Lipid metabolism	ko00121	Secondary bile acid biosynthesis	0.00135413	0.00137759	0.00131656	0.00143026	0.0012555	0.00122516	0.00140208	0.00134283	0.00123404	0.00124124	0.00081132	0.00138521	0.00131035	0.000946424	0.00052918	0.00132404	0.00121179	0.00108946	0.00110938	0.00108563	0.00115932	0.00120035	0.00121788	0.0012708
Metabolism	Metabolism of cofactors and vitamins	ko00130	Ubiquinone and other terpenoid-quinone biosynthesis	0.0034382	0.00338107	0.00350749	0.00321635	0.00339246	0.00376118	0.00334642	0.00358854	0.00318665	0.00312186	0.003611	0.00333465	0.00345616	0.00465282	0.00373173	0.00325383	0.00372217	0.00397648	0.00407649	0.00399839	0.00401335	0.00371881	0.00375864	0.00359568
Metabolism	Lipid metabolism	ko00140	Steroid hormone biosynthesis	0.000423022	0.000411229	0.000419091	0.000387402	0.000417293	0.000455607	0.000407189	0.000436651	0.000392225	0.000378432	0.000430386	0.000397892	0.000411711	0.000503306	0.000430463	0.000395698	0.000441696	0.000460811	0.000476195	0.000470599	0.000457696	0.00044696	0.000443382	0.000425763
Metabolism	Energy metabolism	ko00190	Oxidative phosphorylation	0.01317	0.012892	0.0133001	0.0125358	0.0132671	0.0137225	0.0128422	0.0134083	0.0128531	0.0124085	0.0136181	0.0126596	0.0130125	0.014276	0.0133198	0.0127305	0.0136283	0.0142492	0.0140723	0.0139962	0.0138268	0.0136612	0.0138151	0.0133659
Metabolism	Energy metabolism	ko00195	Photosynthesis	0.00398044	0.00389428	0.00397689	0.00385406	0.0040105	0.00398895	0.00389995	0.0040043	0.00392014	0.00374161	0.00381765	0.00382776	0.00388226	0.00361041	0.00344139	0.00386709	0.0039851	0.00408811	0.00391618	0.00391081	0.00387762	0.00397732	0.00405569	0.00395899
Metabolism	Energy metabolism	ko00196	Photosynthesis - antenna proteins	2.57772e-09	6.44725e-09	9.2367e-09	4.39333e-09	4.65086e-09	4.20367e-09	7.25626e-09	5.38036e-09	1.40074e-09	2.37421e-09	5.2982e-09	1.97549e-08	7.74724e-09	1.10081e-08	3.09488e-09	6.84992e-09	2.43157e-08	2.22446e-08	3.48083e-09	2.25812e-09	3.07328e-09	5.21511e-09	3.15286e-09	8.91452e-09
Metabolism	Nucleotide metabolism	ko00230	Purine metabolism	0.0502825	0.0507935	0.0498878	0.0518502	0.0496119	0.0483528	0.0510854	0.0497852	0.0501917	0.0507032	0.0458409	0.0511575	0.050232	0.0447848	0.0438294	0.0507922	0.0484486	0.0468208	0.0466637	0.0466576	0.0476746	0.0482967	0.0484692	0.0494134
Metabolism	Biosynthesis of other secondary metabolites	ko00232	Caffeine metabolism	3.84095e-07	7.80976e-07	1.06634e-06	4.48473e-07	6.2167e-07	1.74947e-06	4.87791e-07	8.72694e-07	4.50233e-07	1.02087e-06	3.71887e-06	1.6413e-06	1.60529e-06	8.23067e-06	6.46471e-06	8.22887e-07	2.83333e-06	3.83398e-06	3.54461e-06	3.30824e-06	3.89256e-06	1.93856e-06	2.02632e-06	1.92325e-06
Metabolism	Nucleotide metabolism	ko00240	Pyrimidine metabolism	0.0398316	0.0403598	0.0393687	0.0413897	0.0391415	0.0378399	0.0406392	0.0392974	0.0397185	0.0402512	0.0352342	0.0407556	0.0397066	0.0339613	0.0331771	0.0403514	0.0379746	0.0362027	0.0360629	0.0360721	0.0369851	0.0377714	0.0378498	0.0388771
Metabolism	Amino acid metabolism	ko00250	Alanine, aspartate and glutamate metabolism	0.0145037	0.0146532	0.0143457	0.0149558	0.0142095	0.0139585	0.0147374	0.0144179	0.0142752	0.0143804	0.0128068	0.0147545	0.0144829	0.0130969	0.0119951	0.0145556	0.0139752	0.0135265	0.0134797	0.0134276	0.0138524	0.0139023	0.0140293	0.0142693
Metabolism	Metabolism of terpenoids and polyketides	ko00253	Tetracycline biosynthesis	0.000442172	0.000428525	0.000433921	0.000400825	0.000454769	0.000474352	0.000421079	0.000446471	0.000444926	0.000432873	0.000522339	0.000415082	0.000430401	0.000490501	0.000558447	0.000427282	0.000460112	0.000477269	0.000464464	0.000468635	0.000458551	0.000460716	0.00045496	0.00043985
Metabolism	Amino acid metabolism	ko00260	Glycine, serine and threonine metabolism	0.00984884	0.00993122	0.00990837	0.0099635	0.00983313	0.00989942	0.00991203	0.00988252	0.00983007	0.00994106	0.00993237	0.0100707	0.00997623	0.0104804	0.0101211	0.00993669	0.0100762	0.0101007	0.0102298	0.0101962	0.0101262	0.0100008	0.00995319	0.0100091
Metabolism	Amino acid metabolism	ko00270	Cysteine and methionine metabolism	0.0123557	0.012503	0.0123614	0.0127115	0.0123236	0.0121432	0.012533	0.0122726	0.0125356	0.0127593	0.0123029	0.012624	0.0125267	0.0122742	0.0125556	0.0125942	0.0122001	0.0120119	0.0121207	0.0121417	0.0122938	0.0122091	0.0121966	0.0123684
Metabolism	Amino acid metabolism	ko00280	Valine, leucine and isoleucine degradation	0.00215932	0.00210339	0.00227467	0.0019734	0.00227439	0.00249172	0.00206009	0.00225727	0.00220316	0.00215041	0.0029788	0.00207708	0.00225621	0.00337249	0.00339331	0.0021188	0.00250938	0.00283329	0.00285102	0.00283899	0.00275872	0.00252677	0.00254696	0.0023827
Metabolism	Metabolism of terpenoids and polyketides	ko00281	Geraniol degradation	0.000610495	0.000642628	0.000616645	0.000664698	0.000588554	0.000593424	0.000642473	0.000612768	0.000595961	0.000636015	0.000549387	0.000683937	0.000645466	0.00070185	0.000571652	0.000637968	0.000632431	0.000605651	0.000615782	0.000605482	0.000642774	0.000601056	0.000600876	0.000631893
Metabolism	Amino acid metabolism	ko00290	Valine, leucine and isoleucine biosynthesis	0.00131451	0.00135676	0.00140307	0.00130035	0.00157384	0.00153854	0.00129388	0.00126621	0.00177852	0.00195203	0.00285756	0.00144266	0.00150507	0.00228872	0.00391791	0.00157432	0.00164081	0.00176668	0.0018456	0.00193862	0.0016997	0.00165117	0.00148068	0.0015082
Metabolism	Amino acid metabolism	ko00300	Lysine biosynthesis	0.01374	0.0137082	0.0136149	0.0137781	0.0135742	0.0134778	0.013752	0.0137366	0.0134537	0.0132873	0.0125004	0.0136655	0.0135687	0.0125517	0.0115697	0.0135742	0.0134408	0.0132927	0.0130585	0.0130131	0.0132457	0.0133766	0.0135362	0.0135463
Metabolism	Amino acid metabolism	ko00310	Lysine degradation	0.00240579	0.00242311	0.00244862	0.00238719	0.00245025	0.00253836	0.0023957	0.00243964	0.00245113	0.00249742	0.00280681	0.00246462	0.00249338	0.00306833	0.00310713	0.00244359	0.00259069	0.00269338	0.00272502	0.00271922	0.0027055	0.0025661	0.00255401	0.00252874
Metabolism	Biosynthesis of other secondary metabolites	ko00311	Penicillin and cephalosporin biosynthesis	0.00114913	0.00116845	0.00114042	0.00118433	0.00113821	0.00113257	0.00116917	0.00114084	0.00116174	0.00119681	0.00114929	0.00117943	0.00116965	0.00117997	0.00120635	0.00117287	0.00112594	0.00109576	0.00110801	0.00110959	0.00115092	0.00112406	0.00112202	0.00114392
Metabolism	Amino acid metabolism	ko00330	Arginine and proline metabolism	0.0109354	0.0109201	0.0111298	0.0106829	0.0111075	0.011611	0.0108129	0.0111224	0.011024	0.0111126	0.0126591	0.0109528	0.0112202	0.0138546	0.0138656	0.0109499	0.0116694	0.0122029	0.0124485	0.0124181	0.0122776	0.01169	0.0116386	0.0114157
Metabolism	Biosynthesis of other secondary metabolites	ko00331	Clavulanic acid biosynthesis	9.27739e-09	2.2623e-08	2.88693e-08	1.21315e-08	1.69344e-08	1.52248e-08	1.54924e-08	1.31322e-08	4.01688e-09	1.35552e-08	1.34735e-08	6.75251e-08	1.2246e-08	3.99368e-08	1.20132e-08	2.44537e-08	8.784e-08	8.23838e-08	5.82682e-08	5.33151e-08	1.36984e-08	3.4108e-08	1.47459e-08	3.55842e-08
Metabolism	Amino acid metabolism	ko00340	Histidine metabolism	0.00469366	0.00458294	0.00474674	0.00436366	0.00490138	0.00509567	0.00450319	0.00478285	0.00481001	0.00467102	0.00581862	0.00453772	0.00472826	0.00579508	0.00627127	0.00462803	0.00513495	0.00551427	0.00535331	0.00537319	0.00523172	0.00509913	0.00511047	0.00490611
Metabolism	Amino acid metabolism	ko00350	Tyrosine metabolism	0.00602741	0.00600172	0.00597	0.00595252	0.0059907	0.00607687	0.00599148	0.00605524	0.00593427	0.00589777	0.00594303	0.0059579	0.00599414	0.00613592	0.00590013	0.00595004	0.00600763	0.00602447	0.0060015	0.00598652	0.00606759	0.00600918	0.0060389	0.00599989
Metabolism	Amino acid metabolism	ko00360	Phenylalanine metabolism	0.00202445	0.00200926	0.00210905	0.00190766	0.00212538	0.00228669	0.00196878	0.002077	0.00211853	0.00215544	0.00282688	0.00201346	0.00211863	0.00305008	0.00336005	0.00205135	0.002306	0.00249949	0.00262265	0.00262968	0.002484	0.00233556	0.00226814	0.00219221
Metabolism	Xenobiotics biodegradation and metabolism	ko00361	Chlorocyclohexane and chlorobenzene degradation	0.000743801	0.000746409	0.000737089	0.000746205	0.000720555	0.00073963	0.000747958	0.000751583	0.000703689	0.000702393	0.00064957	0.000746831	0.000739374	0.000751892	0.000606092	0.000727342	0.000735107	0.000726208	0.000730926	0.000720983	0.000745891	0.000729015	0.000737302	0.000738232
Metabolism	Xenobiotics biodegradation and metabolism	ko00362	Benzoate degradation	0.00408864	0.00411513	0.00409427	0.00415517	0.00398026	0.0040448	0.0041348	0.00412371	0.0039177	0.00392738	0.00361801	0.00413356	0.00409343	0.00413281	0.00339704	0.00404085	0.00405568	0.00402193	0.00411905	0.00406913	0.00412062	0.0040522	0.00407987	0.0040937
Metabolism	Xenobiotics biodegradation and metabolism	ko00363	Bisphenol degradation	0.00226525	0.00222853	0.00223456	0.00215675	0.00222601	0.00233825	0.00221719	0.00230779	0.00213207	0.00207302	0.00214307	0.00218768	0.00221159	0.00239787	0.0020445	0.00216036	0.00229263	0.00233103	0.00231735	0.002293	0.00232069	0.00228245	0.00230155	0.00225039
Metabolism	Xenobiotics biodegradation and metabolism	ko00364	Fluorobenzoate degradation	3.99578e-05	4.04478e-05	4.41495e-05	3.98032e-05	4.03763e-05	4.7086e-05	3.99526e-05	4.3489e-05	3.83549e-05	3.8714e-05	5.18444e-05	4.17002e-05	4.55342e-05	7.98852e-05	6.00632e-05	3.96785e-05	4.91094e-05	5.74011e-05	5.86989e-05	5.6986e-05	6.02595e-05	4.85436e-05	5.14747e-05	4.79529e-05
Metabolism	Amino acid metabolism	ko00380	Tryptophan metabolism	0.000489677	0.000494939	0.000520857	0.000452884	0.000504938	0.000609934	0.000474763	0.000528553	0.000481895	0.000509244	0.000747384	0.00051064	0.0005457	0.0010537	0.000956271	0.0004888	0.000626388	0.000713285	0.000756498	0.000742741	0.000744149	0.000616275	0.000612006	0.000578546
Metabolism	Amino acid metabolism	ko00400	Phenylalanine, tyrosine and tryptophan biosynthesis	0.00375608	0.00363138	0.00397348	0.0032188	0.00440459	0.00463759	0.0034481	0.00379596	0.00457932	0.00464267	0.00753559	0.00360808	0.00401419	0.00650329	0.00970742	0.0039965	0.00471634	0.00538755	0.00539691	0.00557783	0.0049565	0.00478055	0.00450203	0.00424354
Metabolism	Biosynthesis of other secondary metabolites	ko00401	Novobiocin biosynthesis	0.000517982	0.000513054	0.00052562	0.000495516	0.000547308	0.000554332	0.000504487	0.000518657	0.000556677	0.000558525	0.000684721	0.000513026	0.000530337	0.000631787	0.000779412	0.000529626	0.000557847	0.000586321	0.000571857	0.000580397	0.000567612	0.000555741	0.000549015	0.000538123
Metabolism	Metabolism of other amino acids	ko00410	beta-Alanine metabolism	0.000308323	0.000310435	0.000348804	0.000288719	0.000318944	0.000393497	0.000302054	0.000338332	0.000302101	0.00031788	0.000485756	0.000317334	0.000351228	0.000715957	0.000622933	0.000308093	0.000405706	0.000477128	0.000542225	0.000530806	0.000500345	0.000416266	0.000407482	0.00037924
Metabolism	Metabolism of other amino acids	ko00430	Taurine and hypotaurine metabolism	0.00122857	0.0012323	0.00123196	0.00122844	0.00121866	0.00123323	0.00123029	0.00123657	0.00120074	0.00120041	0.00117815	0.00124552	0.00122597	0.00125735	0.0011487	0.00122192	0.00125663	0.00125687	0.00127632	0.0012685	0.00124066	0.00124516	0.00123596	0.00123975
Metabolism	Metabolism of other amino acids	ko00440	Phosphonate and phosphinate metabolism	0.000861297	0.000843052	0.000861569	0.000795659	0.000884176	0.000934624	0.000829243	0.000875517	0.000866479	0.000855027	0.00104143	0.000827442	0.000858321	0.00105686	0.0011434	0.000842719	0.000919756	0.000963929	0.000969691	0.000972814	0.000941851	0.000923817	0.000907426	0.000879454
Metabolism	Metabolism of other amino acids	ko00450	Selenocompound metabolism	0.00609914	0.00612309	0.00610182	0.00617531	0.00603961	0.00601897	0.00614279	0.00609559	0.00603975	0.00605315	0.00579166	0.00613465	0.00610313	0.00594112	0.00564496	0.00609577	0.00601272	0.00595741	0.00595437	0.005936	0.00603547	0.00600581	0.00604467	0.0060719
Metabolism	Metabolism of other amino acids	ko00460	Cyanoamino acid metabolism	0.00157774	0.00157384	0.00159091	0.00156984	0.00161845	0.00159527	0.00157091	0.00156414	0.00165088	0.00166202	0.0017766	0.00157157	0.00158836	0.0016058	0.0018918	0.00160968	0.00159606	0.00160917	0.00162912	0.00164545	0.00158641	0.00161593	0.00158604	0.00158727
Metabolism	Metabolism of other amino acids	ko00471	D-Glutamine and D-glutamate metabolism	0.00250482	0.00254087	0.00248618	0.00260021	0.00248339	0.00241607	0.00255146	0.00247648	0.00253334	0.00257996	0.00237513	0.00256978	0.00252807	0.00232039	0.00235437	0.00255512	0.00242701	0.00235069	0.00233865	0.00234379	0.00241312	0.00241607	0.00242592	0.00247847
Metabolism	Metabolism of other amino acids	ko00472	D-Arginine and D-ornithine metabolism	3.79632e-06	3.98956e-06	7.12966e-06	2.58652e-06	5.00326e-06	1.08126e-05	3.31995e-06	6.17314e-06	4.07746e-06	5.56249e-06	1.99712e-05	4.43782e-06	7.68598e-06	3.81685e-05	3.22086e-05	4.20296e-06	1.16916e-05	1.7971e-05	2.42684e-05	2.34742e-05	2.02404e-05	1.32627e-05	1.24559e-05	9.99713e-06
Metabolism	Metabolism of other amino acids	ko00473	D-Alanine metabolism	0.00449179	0.00450891	0.00449949	0.00450468	0.00450414	0.00452215	0.00450562	0.00447839	0.004549	0.00461801	0.00470634	0.00450731	0.00451856	0.00467806	0.00494364	0.00453585	0.00449252	0.00446846	0.00460381	0.00461767	0.00454454	0.00454088	0.00447047	0.00449541
Metabolism	Metabolism of other amino acids	ko00480	Glutathione metabolism	0.010552	0.0105583	0.0103717	0.0106726	0.0104072	0.0101745	0.0106061	0.0104713	0.0103985	0.0103273	0.00936308	0.010547	0.010374	0.00892326	0.00854952	0.0104892	0.0101434	0.00983472	0.00963251	0.00962981	0.00979925	0.0100843	0.0101542	0.01027
Metabolism	Carbohydrate metabolism	ko00500	Starch and sucrose metabolism	0.0232243	0.0230276	0.0229559	0.022825	0.0233238	0.0230978	0.0230166	0.0230749	0.0233157	0.0230746	0.0231728	0.0227792	0.0227623	0.0211568	0.0228119	0.0230567	0.022834	0.0225718	0.0224086	0.0225469	0.0221595	0.0229334	0.0227272	0.022738
Metabolism	Glycan biosynthesis and metabolism	ko00510	N-Glycan biosynthesis	0.00109473	0.0010552	0.00108606	0.00101167	0.00112552	0.00114748	0.00104654	0.00110702	0.00109759	0.00103896	0.00120871	0.0010179	0.00106563	0.00111566	0.00119431	0.00105349	0.00112188	0.00118251	0.00113015	0.00113605	0.00111714	0.00113033	0.00114509	0.00109541
Metabolism	Glycan biosynthesis and metabolism	ko00511	Other glycan degradation	0.00447708	0.00439374	0.00462746	0.00419791	0.00503241	0.00488015	0.00430086	0.00436284	0.00535038	0.00542561	0.00729321	0.00434913	0.00460529	0.00535102	0.00885826	0.00479393	0.00489915	0.00519294	0.00517566	0.00539584	0.00481525	0.0050247	0.00473802	0.00466044
Metabolism	Carbohydrate metabolism	ko00520	Amino sugar and nucleotide sugar metabolism	0.0241061	0.0238589	0.0241178	0.023587	0.0242651	0.0244192	0.0238314	0.0241684	0.0241112	0.0237875	0.0247719	0.0235763	0.023899	0.0241689	0.0247439	0.0238357	0.0241588	0.024483	0.0242659	0.0243033	0.0241939	0.0242826	0.0243424	0.0240453
Metabolism	Biosynthesis of other secondary metabolites	ko00521	Streptomycin biosynthesis	0.00217422	0.00214515	0.00220859	0.00212261	0.00223701	0.00223123	0.00213915	0.00218032	0.00224235	0.00219976	0.00243305	0.00212421	0.00218518	0.00228287	0.00249921	0.00217566	0.00223293	0.00232193	0.00226039	0.00227382	0.00225037	0.00224276	0.00226316	0.00221383
Metabolism	Metabolism of terpenoids and polyketides	ko00522	Biosynthesis of 12-, 14- and 16-membered macrolides	3.36843e-05	3.57293e-05	4.01427e-05	1.96262e-05	3.89057e-05	0.000105874	2.53146e-05	5.77072e-05	3.7792e-05	5.2381e-05	0.000209733	2.68156e-05	8.29919e-05	0.000420206	0.000361129	3.05298e-05	7.63271e-05	0.000139022	0.000130155	0.000124205	0.000215616	8.13373e-05	0.000116498	8.24964e-05
Metabolism	Metabolism of terpenoids and polyketides	ko00523	Polyketide sugar unit biosynthesis	0.00128994	0.00129638	0.00131752	0.00133186	0.00132252	0.00125873	0.00130266	0.00127532	0.00135983	0.00135504	0.00135842	0.00131049	0.00131828	0.00121449	0.0013552	0.0013308	0.0012878	0.00130592	0.00124002	0.0012503	0.00127935	0.0012791	0.00130963	0.00131085
Metabolism	Biosynthesis of other secondary metabolites	ko00524	Neomycin, kanamycin and gentamicin biosynthesis	0.000414584	0.000406349	0.000411936	0.000392176	0.000417426	0.000431916	0.000404148	0.000418032	0.000409454	0.000402837	0.000443341	0.000395758	0.000405373	0.000438953	0.000456707	0.000403369	0.000420657	0.000428651	0.000442933	0.000443964	0.000422777	0.000429512	0.000420345	0.000411863
Metabolism	Glycan biosynthesis and metabolism	ko00531	Glycosaminoglycan degradation	0.000179104	0.000163473	0.000177916	0.000133691	0.000272666	0.000222014	0.000147338	0.000147734	0.000337415	0.000346033	0.000624464	0.000153041	0.000189826	0.000201459	0.000866115	0.000234391	0.000212125	0.000236994	0.000182033	0.000223482	0.000173128	0.000222018	0.000185427	0.000181238
Metabolism	Glycan biosynthesis and metabolism	ko00532	Glycosaminoglycan biosynthesis - chondroitin sulfate / dermatan sulfate	0.000208706	0.000208106	0.000215706	0.000209326	0.00021235	0.000214884	0.000208663	0.000210473	0.000214502	0.000214798	0.000233638	0.000206491	0.0002148	0.000241906	0.000247487	0.000210788	0.000213166	0.000223245	0.000226976	0.00022694	0.000227556	0.000217999	0.000220805	0.000216006
Metabolism	Glycan biosynthesis and metabolism	ko00540	Lipopolysaccharide biosynthesis	0.00148375	0.00147308	0.00145853	0.00145609	0.00147295	0.00146291	0.00147001	0.00148458	0.00144671	0.00142509	0.00134618	0.00147877	0.00144913	0.00130124	0.00121491	0.0014516	0.00147862	0.00145975	0.0013527	0.00134938	0.00139736	0.00142807	0.0014532	0.00145355
Metabolism	Glycan biosynthesis and metabolism	ko00550	Peptidoglycan biosynthesis	0.0224588	0.0226093	0.0223726	0.0228531	0.0225949	0.0220787	0.0226272	0.02222	0.0230267	0.0232936	0.0228823	0.0227425	0.0225904	0.0214121	0.0233421	0.0228768	0.0221384	0.0217877	0.0216251	0.0217645	0.0219044	0.0221151	0.0220457	0.0223226
Metabolism	Lipid metabolism	ko00561	Glycerolipid metabolism	0.0124067	0.0124351	0.0122921	0.0125174	0.012132	0.0121798	0.0124906	0.0124194	0.0120191	0.0120161	0.0110786	0.0123988	0.0122761	0.0116989	0.0104237	0.0122589	0.0120716	0.0118233	0.0120269	0.01195	0.0120602	0.0121147	0.0121321	0.012211
Metabolism	Carbohydrate metabolism	ko00562	Inositol phosphate metabolism	0.00174755	0.0016442	0.00186999	0.00150034	0.00184577	0.00208366	0.00161559	0.00186546	0.00171383	0.00157839	0.00238073	0.00155951	0.00177851	0.00278588	0.00257651	0.00162639	0.0020636	0.00242989	0.00249242	0.00246768	0.00230099	0.00213325	0.00216421	0.00194776
Metabolism	Lipid metabolism	ko00564	Glycerophospholipid metabolism	0.0142268	0.0144152	0.0142154	0.0147818	0.0138674	0.0136337	0.0145365	0.0141655	0.0138888	0.0140376	0.0121634	0.0145811	0.0142191	0.012841	0.011161	0.0142908	0.0137664	0.0133026	0.0135278	0.013426	0.013612	0.013723	0.0137756	0.0140576
Metabolism	Lipid metabolism	ko00565	Ether lipid metabolism	5.04714e-05	5.08588e-05	5.14875e-05	4.43669e-05	7.10411e-05	6.23548e-05	4.63345e-05	4.34696e-05	8.72361e-05	9.6822e-05	0.000159984	5.3121e-05	5.64852e-05	7.84324e-05	0.000230455	6.77643e-05	6.5438e-05	6.78672e-05	7.01854e-05	8.00449e-05	5.64281e-05	6.76955e-05	5.15925e-05	5.50517e-05
Metabolism	Lipid metabolism	ko00590	Arachidonic acid metabolism	7.12163e-05	6.26495e-05	7.55291e-05	3.77411e-05	9.27841e-05	0.00011176	5.3104e-05	7.76279e-05	8.65789e-05	7.96253e-05	0.00019589	6.13502e-05	7.38792e-05	0.000182235	0.000258471	6.85978e-05	0.0001171	0.000147385	0.00013291	0.000136437	0.000119666	0.000110072	0.000104361	8.96239e-05
Metabolism	Lipid metabolism	ko00591	Linoleic acid metabolism	0.00185135	0.00181122	0.00179407	0.00175016	0.00179881	0.00187375	0.00180674	0.00187726	0.0017104	0.00164145	0.00160004	0.00175992	0.00176562	0.00173121	0.00141099	0.00173907	0.00181154	0.00180207	0.00176793	0.00174908	0.00178534	0.00180312	0.00182153	0.00178687
Metabolism	Lipid metabolism	ko00592	alpha-Linolenic acid metabolism	3.33231e-05	3.49051e-05	3.3885e-05	3.60074e-05	3.22947e-05	3.25183e-05	3.49272e-05	3.35269e-05	3.2589e-05	3.44382e-05	3.02837e-05	3.70297e-05	3.50998e-05	3.83301e-05	3.12464e-05	3.46233e-05	3.45435e-05	3.35119e-05	3.30985e-05	3.2501e-05	3.52982e-05	3.26551e-05	3.31673e-05	3.45607e-05
Metabolism	Lipid metabolism	ko00600	Sphingolipid metabolism	0.00178366	0.00178464	0.00173537	0.00179612	0.00182805	0.00171442	0.00178222	0.00172701	0.00190308	0.00191357	0.00189923	0.0017781	0.00176116	0.00140264	0.00195515	0.00183574	0.00169232	0.00161538	0.00151032	0.00155286	0.0015844	0.00168236	0.00166915	0.00170924
Metabolism	Glycan biosynthesis and metabolism	ko00601	Glycosphingolipid biosynthesis - lacto and neolacto series	0.000113111	0.000117446	0.000110518	0.000126468	0.000105124	9.77708e-05	0.000120047	0.000110966	0.000106573	0.000109379	6.46076e-05	0.000121158	0.000112892	7.4002e-05	3.98738e-05	0.000114998	0.000100299	8.85666e-05	8.93533e-05	8.75924e-05	9.56646e-05	9.84105e-05	0.000101135	0.000107915
Metabolism	Glycan biosynthesis and metabolism	ko00603	Glycosphingolipid biosynthesis - globo and isoglobo series	0.000734898	0.000712244	0.000705432	0.000692728	0.000765582	0.000726767	0.00070761	0.00071635	0.000777476	0.000746763	0.000808185	0.000688749	0.000699924	0.000537554	0.000797937	0.000729294	0.000704082	0.000695335	0.000625186	0.000644855	0.000639054	0.000703491	0.000701348	0.000694832
Metabolism	Glycan biosynthesis and metabolism	ko00604	Glycosphingolipid biosynthesis - ganglio series	5.68319e-05	5.02553e-05	5.57741e-05	3.53317e-05	9.14455e-05	7.69694e-05	4.33282e-05	4.60241e-05	0.000113691	0.000117033	0.000228481	4.49364e-05	5.93219e-05	7.52374e-05	0.00032391	7.51693e-05	7.12701e-05	8.083e-05	6.19587e-05	7.77969e-05	5.74509e-05	7.48968e-05	5.95316e-05	5.70113e-05
Metabolism	Carbohydrate metabolism	ko00620	Pyruvate metabolism	0.0122555	0.0120433	0.0122243	0.0117368	0.012285	0.0126094	0.0119885	0.012412	0.0119408	0.0115907	0.0123138	0.0118748	0.0120419	0.012669	0.0119387	0.0118823	0.0125314	0.0128692	0.0126646	0.0126137	0.0125017	0.0124942	0.0125774	0.0122912
Metabolism	Xenobiotics biodegradation and metabolism	ko00621	Dioxin degradation	0.000597463	0.000595537	0.000591441	0.000593371	0.000587456	0.000593855	0.00059669	0.000599351	0.00057924	0.000575013	0.000550927	0.000590968	0.000588833	0.00057351	0.000524485	0.000586803	0.00058671	0.00057978	0.000584845	0.000581983	0.000584879	0.000588188	0.000588553	0.00058835
Metabolism	Xenobiotics biodegradation and metabolism	ko00622	Xylene degradation	0.000612626	0.000613615	0.000609437	0.000614931	0.000602931	0.000608335	0.000614932	0.000614798	0.000597026	0.000596339	0.000570038	0.000613005	0.000609517	0.000603938	0.000549334	0.000606443	0.00060589	0.000600158	0.000606623	0.000603274	0.000608035	0.000605904	0.00060729	0.000608627
Metabolism	Xenobiotics biodegradation and metabolism	ko00623	Toluene degradation	0.000959094	0.00096921	0.000940404	0.000989318	0.000916064	0.000910775	0.000977204	0.000959688	0.000899985	0.000898855	0.000723742	0.000976321	0.000944822	0.000820597	0.000595552	0.000942311	0.000911803	0.000869296	0.000862642	0.000849691	0.000895202	0.000897598	0.000914703	0.000932367
Metabolism	Xenobiotics biodegradation and metabolism	ko00624	Polycyclic aromatic hydrocarbon degradation	0.00283181	0.00284049	0.00281873	0.00286232	0.00285839	0.00280453	0.00284032	0.00280858	0.00290506	0.00292116	0.00293103	0.00284706	0.00284855	0.00274793	0.0029938	0.00287493	0.00280642	0.00278872	0.00276442	0.00278247	0.00279108	0.00281079	0.00280771	0.00282478
Metabolism	Xenobiotics biodegradation and metabolism	ko00625	Chloroalkane and chloroalkene degradation	0.00317796	0.00313125	0.0031041	0.00305492	0.00310965	0.00320036	0.0031252	0.00320694	0.0030029	0.00292258	0.00285725	0.00306964	0.00307048	0.00301207	0.00262696	0.00304095	0.00312126	0.00309779	0.00304788	0.00302513	0.00308302	0.00310534	0.00312728	0.00309063
Metabolism	Xenobiotics biodegradation and metabolism	ko00626	Naphthalene degradation	0.00113245	0.00115275	0.00113495	0.00117488	0.0011077	0.00110668	0.00115731	0.00113246	0.0011103	0.00113416	0.00103085	0.00117378	0.00114696	0.00113641	0.00100871	0.00114464	0.00112417	0.00109675	0.00112336	0.00111451	0.00113049	0.00111501	0.00111363	0.00113601
Metabolism	Xenobiotics biodegradation and metabolism	ko00627	Aminobenzoate degradation	0.00363682	0.00365052	0.00367965	0.00363164	0.00362578	0.00375022	0.00364049	0.00368435	0.0036026	0.00364159	0.00382233	0.00365864	0.00371109	0.00427878	0.00402303	0.00363315	0.00374478	0.0038345	0.00393963	0.00391469	0.00393652	0.00376461	0.00377071	0.00373395
Metabolism	Carbohydrate metabolism	ko00630	Glyoxylate and dicarboxylate metabolism	0.00487128	0.00485966	0.00499156	0.00477042	0.00488292	0.00519215	0.00482506	0.00501182	0.00476554	0.00475686	0.00534558	0.00486903	0.00502005	0.00638964	0.00567232	0.00480553	0.00522153	0.0055346	0.0056271	0.00556353	0.00561884	0.0052189	0.00529043	0.00513757
Metabolism	Xenobiotics biodegradation and metabolism	ko00633	Nitrotoluene degradation	0.000898071	0.00090486	0.000914025	0.000912968	0.000890149	0.000902816	0.000906002	0.000908727	0.000877726	0.00087978	0.000859724	0.00092024	0.00091031	0.000969949	0.00083669	0.000898742	0.00092977	0.000944076	0.000970964	0.000961195	0.000939541	0.000925117	0.00092525	0.000924461
Metabolism	Carbohydrate metabolism	ko00640	Propanoate metabolism	0.0027677	0.00274766	0.00281811	0.0026581	0.00283304	0.00299288	0.00271422	0.00282224	0.00280818	0.0028283	0.00336544	0.00273477	0.00283698	0.00364263	0.00376773	0.00276296	0.00298628	0.00315405	0.00326766	0.00326669	0.00316366	0.00302116	0.0029784	0.00290096
Metabolism	Xenobiotics biodegradation and metabolism	ko00642	Ethylbenzene degradation	0.00136917	0.0013546	0.00137365	0.00132154	0.00135862	0.00143188	0.00134867	0.00139703	0.00132153	0.00130685	0.00140614	0.00133359	0.00136914	0.00159476	0.00143519	0.00132924	0.00140463	0.00145201	0.00147542	0.00146207	0.00147539	0.00141516	0.0014258	0.00139
Metabolism	Xenobiotics biodegradation and metabolism	ko00643	Styrene degradation	7.98668e-05	8.28074e-05	0.000104205	7.76421e-05	9.27379e-05	0.0001138	7.93501e-05	8.937e-05	9.31647e-05	0.000102848	0.000183393	9.10564e-05	0.000103396	0.000249014	0.000253818	9.0213e-05	0.000128503	0.000161104	0.000186389	0.000184164	0.000161304	0.000131642	0.000125066	0.000115804
Metabolism	Carbohydrate metabolism	ko00650	Butanoate metabolism	0.00581115	0.00571195	0.00579583	0.00549913	0.00584924	0.00612394	0.00566153	0.00590487	0.0056972	0.00559717	0.006272	0.00561315	0.00575265	0.00660057	0.00648843	0.00564604	0.00603254	0.00623598	0.00629113	0.00627678	0.00615377	0.00606307	0.00602565	0.00587251
Metabolism	Carbohydrate metabolism	ko00660	C5-Branched dibasic acid metabolism	0.000765028	0.000769919	0.00078071	0.00074167	0.000817806	0.000835397	0.00075094	0.000764711	0.000843597	0.000873311	0.00110154	0.000788526	0.000802392	0.00104464	0.00133022	0.000806049	0.000860312	0.000901158	0.000913894	0.000928972	0.000878333	0.000853442	0.000818469	0.000815226
Metabolism	Metabolism of cofactors and vitamins	ko00670	One carbon pool by folate	0.00607004	0.00614609	0.00601133	0.00628863	0.00601521	0.00579903	0.00617789	0.00598165	0.00612523	0.00620951	0.0055965	0.00621738	0.00606709	0.00525244	0.00539332	0.00617953	0.00584651	0.00560835	0.00556166	0.00557875	0.00567065	0.0058073	0.00580166	0.00595286
Metabolism	Energy metabolism	ko00680	Methane metabolism	0.0105748	0.0106106	0.0105775	0.0106746	0.0104048	0.0104698	0.0106472	0.0106068	0.0103324	0.010353	0.00981833	0.0106172	0.0105578	0.0104469	0.0094681	0.0104987	0.010435	0.0103428	0.010436	0.0103707	0.0105264	0.0104359	0.0104953	0.0105256
Metabolism	Energy metabolism	ko00710	Carbon fixation in photosynthetic organisms	0.00598996	0.00596689	0.00598126	0.00601435	0.00595795	0.00587961	0.00599463	0.00598259	0.00592201	0.00584179	0.00556159	0.00594939	0.00592062	0.00543402	0.00516437	0.00594541	0.0059	0.00587105	0.00586206	0.00585205	0.00577853	0.0059175	0.0059408	0.00593836
Metabolism	Energy metabolism	ko00720	Carbon fixation pathways in prokaryotes	0.00648	0.00655651	0.00652713	0.00663361	0.00640707	0.00643022	0.00657177	0.00648935	0.00642391	0.00653456	0.00626051	0.00663759	0.00656015	0.00671347	0.00629551	0.00654093	0.00650038	0.00644031	0.00661616	0.00658226	0.00657763	0.00649466	0.00646468	0.0065359
Metabolism	Metabolism of cofactors and vitamins	ko00730	Thiamine metabolism	0.00581656	0.00579215	0.00579484	0.00573016	0.00586438	0.00591997	0.00576768	0.00582838	0.00586348	0.00585626	0.00615828	0.00576499	0.00582396	0.00610893	0.00636409	0.00580677	0.00588199	0.00594743	0.00593517	0.00595154	0.00593782	0.00589538	0.00588249	0.00584099
Metabolism	Metabolism of cofactors and vitamins	ko00740	Riboflavin metabolism	0.0028492	0.00286338	0.0027538	0.00282407	0.00280943	0.00282878	0.00284438	0.00283308	0.0028021	0.00283803	0.00273733	0.00287342	0.00280711	0.00272597	0.0027654	0.00283242	0.00280071	0.00269155	0.00263937	0.00264418	0.00272814	0.00274578	0.00272027	0.00276971
Metabolism	Metabolism of cofactors and vitamins	ko00750	Vitamin B6 metabolism	0.00227058	0.00227523	0.00226722	0.00228028	0.00230933	0.00227285	0.00226853	0.00225551	0.00234324	0.00235568	0.00243313	0.00229039	0.00228825	0.00227255	0.00252208	0.00231089	0.00229671	0.00230158	0.00228934	0.00230646	0.00226845	0.00229383	0.00227534	0.00228545
Metabolism	Metabolism of cofactors and vitamins	ko00760	Nicotinate and nicotinamide metabolism	0.00998959	0.0101391	0.00992536	0.0104511	0.00976267	0.00948214	0.0102294	0.00989752	0.00986055	0.00998996	0.00857475	0.010263	0.00999716	0.00870034	0.00789721	0.0101026	0.00956851	0.00917342	0.00927762	0.00923799	0.00940629	0.00954487	0.00958339	0.00982535
Metabolism	Metabolism of cofactors and vitamins	ko00770	Pantothenate and CoA biosynthesis	0.00666537	0.00674994	0.00669923	0.00682242	0.00667121	0.00663245	0.00675068	0.0066334	0.00678229	0.00693981	0.0068754	0.00683158	0.00678179	0.00695027	0.00720774	0.00680887	0.0066822	0.0066137	0.00673996	0.00675126	0.00676107	0.0066852	0.00662836	0.00671853
Metabolism	Metabolism of cofactors and vitamins	ko00780	Biotin metabolism	0.00358664	0.00358569	0.00356619	0.00355179	0.00359444	0.00363921	0.00356673	0.00360196	0.00357738	0.00357534	0.00369208	0.00359596	0.00360053	0.00379613	0.00376896	0.00357664	0.00364496	0.00367492	0.00361432	0.00361048	0.00367321	0.0036074	0.00362591	0.00361102
Metabolism	Metabolism of cofactors and vitamins	ko00785	Lipoic acid metabolism	0.00103615	0.00100888	0.0010545	0.000937569	0.00107632	0.00117513	0.000986091	0.00107096	0.00104413	0.00103006	0.00136577	0.000987822	0.00105257	0.00149078	0.00155669	0.00100836	0.00115827	0.0012646	0.00128914	0.00128806	0.00124348	0.00117098	0.00115817	0.00109863
Metabolism	Metabolism of cofactors and vitamins	ko00790	Folate biosynthesis	0.00427643	0.00435332	0.00427283	0.00434002	0.00439987	0.00437721	0.00430985	0.00421551	0.00459302	0.00481921	0.00525317	0.00442839	0.00442697	0.00493813	0.00612622	0.00449576	0.00439597	0.00435319	0.00448267	0.00455118	0.00447838	0.00440946	0.00425507	0.00434893
Metabolism	Xenobiotics biodegradation and metabolism	ko00791	Atrazine degradation	0.000297749	0.000299877	0.000333257	0.000280523	0.00032062	0.000350321	0.000292593	0.000306711	0.00032531	0.000341077	0.00047925	0.000307052	0.000325011	0.000526585	0.000606318	0.000310987	0.000359164	0.000397921	0.000401246	0.000402402	0.000399769	0.000354019	0.000347822	0.000335926
Metabolism	Metabolism of cofactors and vitamins	ko00830	Retinol metabolism	0.000332996	0.000323088	0.000330609	0.000302801	0.000336793	0.000361396	0.00031825	0.000341475	0.000322858	0.000311841	0.000375165	0.000312671	0.000327128	0.00040171	0.000392961	0.0003165	0.000350597	0.000370042	0.000364589	0.000363422	0.000363247	0.000351146	0.000352595	0.000337075
Metabolism	Metabolism of cofactors and vitamins	ko00860	Porphyrin and chlorophyll metabolism	0.00568531	0.00569998	0.00595582	0.00551471	0.00566853	0.00642045	0.00563286	0.00598376	0.00542865	0.00557856	0.00677072	0.00574201	0.00599469	0.00921829	0.00775358	0.00560009	0.00651193	0.00708616	0.00803551	0.00790155	0.00733981	0.00670815	0.00651906	0.00628351
Metabolism	Metabolism of terpenoids and polyketides	ko00900	Terpenoid backbone biosynthesis	0.0123787	0.0124695	0.0123529	0.0126848	0.0121519	0.012017	0.0125523	0.0123381	0.0121564	0.0122278	0.0110848	0.0125247	0.0123332	0.0114153	0.0104414	0.0123881	0.0120451	0.0117519	0.0119907	0.0119342	0.0119465	0.0120846	0.0120767	0.0122373
Metabolism	Biosynthesis of other secondary metabolites	ko00901	Indole alkaloid biosynthesis	7.44568e-08	1.61254e-07	1.71776e-07	7.91701e-08	1.24662e-07	2.7426e-07	8.3506e-08	1.42925e-07	6.86611e-08	1.62097e-07	5.36936e-07	3.92033e-07	2.41932e-07	1.21545e-06	9.07491e-07	1.65819e-07	5.94867e-07	7.14087e-07	5.5073e-07	5.08816e-07	5.57894e-07	3.16962e-07	3.05331e-07	3.41157e-07
Metabolism	Metabolism of terpenoids and polyketides	ko00902	Monoterpenoid biosynthesis	5.47843e-07	9.00559e-07	1.54586e-06	6.31482e-07	7.88655e-07	3.90868e-06	5.86458e-07	1.70437e-06	9.7209e-07	2.1716e-06	9.14391e-06	7.91888e-07	3.38557e-06	2.00603e-05	1.67906e-05	9.38471e-07	3.0354e-06	6.06135e-06	7.94869e-06	7.57977e-06	9.82859e-06	3.93439e-06	4.77921e-06	3.42031e-06
Metabolism	Metabolism of terpenoids and polyketides	ko00903	Limonene and pinene degradation	0.00165473	0.00163971	0.00168192	0.00158886	0.00166245	0.00177865	0.00162418	0.00170161	0.00161734	0.00160731	0.00184976	0.00162575	0.00168688	0.00215861	0.00198018	0.00161829	0.00176456	0.00186935	0.00189992	0.00188246	0.0018946	0.00177108	0.00178702	0.00172784
Metabolism	Metabolism of terpenoids and polyketides	ko00906	Carotenoid biosynthesis	0.00075594	0.000758998	0.000749363	0.000735664	0.000719751	0.000769783	0.000754171	0.000773786	0.00067253	0.000670676	0.000612711	0.000770726	0.000734452	0.000805538	0.000549774	0.000721058	0.000786752	0.00077126	0.00079686	0.000777746	0.000764515	0.000760653	0.000747447	0.000753812
Metabolism	Metabolism of terpenoids and polyketides	ko00908	Zeatin biosynthesis	0.00125983	0.00127276	0.00124294	0.00130596	0.00124252	0.00119273	0.00128194	0.00124131	0.00126078	0.00126963	0.00111198	0.00128299	0.00125136	0.00103616	0.00102892	0.00127488	0.00119839	0.00114496	0.00112919	0.00113141	0.00115592	0.00119187	0.00119733	0.00122708
Metabolism	Metabolism of terpenoids and polyketides	ko00909	Sesquiterpenoid and triterpenoid biosynthesis	1.32677e-05	1.62422e-05	2.12712e-05	1.4043e-05	1.44915e-05	3.97354e-05	1.38167e-05	2.25856e-05	1.54578e-05	2.57148e-05	7.82901e-05	1.52897e-05	3.46207e-05	0.000168312	0.00013881	1.59845e-05	3.27628e-05	5.6272e-05	7.41046e-05	7.08606e-05	8.68816e-05	4.03874e-05	4.65191e-05	3.60105e-05
Metabolism	Energy metabolism	ko00910	Nitrogen metabolism	0.00557988	0.00560618	0.00572114	0.00548783	0.00555954	0.00598911	0.00555311	0.00575593	0.00542174	0.00548817	0.00616624	0.00565849	0.00579554	0.00767668	0.0067102	0.00552201	0.0060384	0.00637004	0.00651985	0.0064337	0.00656086	0.00599689	0.00605884	0.00591536
Metabolism	Energy metabolism	ko00920	Sulfur metabolism	0.00248949	0.00252243	0.00250181	0.00252157	0.00249892	0.00254624	0.00250415	0.0025077	0.00251379	0.00256209	0.00268142	0.00256881	0.00257216	0.00293443	0.00287541	0.00252925	0.00258249	0.00262477	0.00257685	0.00256845	0.00268806	0.00253282	0.00256648	0.00256717
Metabolism	Xenobiotics biodegradation and metabolism	ko00930	Caprolactam degradation	0.000631097	0.000637277	0.000617819	0.000639085	0.000600081	0.000620949	0.000639172	0.000638407	0.000582812	0.000586727	0.000508571	0.000639689	0.000625853	0.000631055	0.000460767	0.000613974	0.000614549	0.000594734	0.000602875	0.000591792	0.000625555	0.000606095	0.000613724	0.000620256
Metabolism	Biosynthesis of other secondary metabolites	ko00940	Phenylpropanoid biosynthesis	0.000403173	0.000383849	0.000439101	0.000349944	0.000462594	0.000486583	0.000373939	0.000409344	0.000475436	0.000472611	0.000743632	0.000368529	0.000422076	0.000645852	0.00092667	0.000418187	0.000482271	0.000555936	0.000595401	0.000609238	0.000517521	0.000514112	0.000481597	0.000448468
Metabolism	Biosynthesis of other secondary metabolites	ko00941	Flavonoid biosynthesis	3.47476e-06	3.81977e-06	5.95279e-06	2.74259e-06	7.13781e-06	8.37657e-06	3.0319e-06	3.52485e-06	9.57996e-06	1.20618e-05	2.80119e-05	4.40862e-06	6.8405e-06	2.52014e-05	4.50034e-05	6.67665e-06	9.09493e-06	1.27189e-05	1.61451e-05	1.71516e-05	1.30324e-05	1.0473e-05	8.13473e-06	7.44663e-06
Metabolism	Biosynthesis of other secondary metabolites	ko00943	Isoflavonoid biosynthesis	1.58931e-06	2.68155e-06	7.01031e-06	2.66823e-06	2.42881e-06	9.8997e-06	2.51845e-06	4.49644e-06	2.71963e-06	6.6799e-06	2.23758e-05	3.00342e-06	8.13509e-06	4.96715e-05	4.10917e-05	3.42678e-06	9.92226e-06	1.75357e-05	3.08769e-05	2.97174e-05	2.4725e-05	1.43879e-05	1.27211e-05	1.00572e-05
Metabolism	Biosynthesis of other secondary metabolites	ko00944	Flavone and flavonol biosynthesis	3.10428e-05	2.90356e-05	2.93844e-05	2.64115e-05	3.4557e-05	3.36279e-05	2.82098e-05	3.02272e-05	3.56227e-05	3.38283e-05	4.68209e-05	2.68804e-05	2.95841e-05	2.8727e-05	5.30747e-05	3.08838e-05	3.13082e-05	3.30451e-05	2.94935e-05	3.11473e-05	2.94893e-05	3.21894e-05	3.14025e-05	2.97865e-05
Metabolism	Biosynthesis of other secondary metabolites	ko00945	Stilbenoid, diarylheptanoid and gingerol biosynthesis	7.92144e-05	7.82409e-05	8.70693e-05	7.09426e-05	9.08253e-05	0.000105906	7.39408e-05	8.51314e-05	9.26384e-05	9.59423e-05	0.000167987	7.8508e-05	9.40228e-05	0.000196883	0.000225199	8.37337e-05	0.000106367	0.000131216	0.000134113	0.000134883	0.000135324	0.000108771	0.000110374	9.98373e-05
Metabolism	Biosynthesis of other secondary metabolites	ko00950	Isoquinoline alkaloid biosynthesis	0.000310186	0.000309801	0.000308704	0.000312594	0.000306181	0.000305229	0.000311105	0.000310973	0.00030397	0.000300346	0.000284611	0.000308478	0.000309	0.000294811	0.000265841	0.000306703	0.000303148	0.000302506	0.000295765	0.0002942	0.000305654	0.000302269	0.000309128	0.000307866
Metabolism	Biosynthesis of other secondary metabolites	ko00960	Tropane, piperidine and pyridine alkaloid biosynthesis	0.000752862	0.000751144	0.000771804	0.00074456	0.000760183	0.000786504	0.00074755	0.000768084	0.000747907	0.000742163	0.000812491	0.000756046	0.000771387	0.000911225	0.000838963	0.000749544	0.000800638	0.000842058	0.000846334	0.000839817	0.000836141	0.000797848	0.000807382	0.0007892
Metabolism	Biosynthesis of other secondary metabolites	ko00965	Betalain biosynthesis	2.45992e-07	3.07749e-07	4.58607e-07	2.42442e-07	5.61863e-07	6.06678e-07	2.39393e-07	2.28492e-07	7.84717e-07	1.03827e-06	2.23521e-06	4.41214e-07	5.30884e-07	1.89795e-06	3.62519e-06	5.81041e-07	7.97991e-07	1.03734e-06	1.40133e-06	1.47441e-06	9.46803e-07	8.68041e-07	5.80215e-07	5.96384e-07
Genetic Information Processing	Translation	ko00970	Aminoacyl-tRNA biosynthesis	0.0487239	0.0491487	0.0481491	0.0501231	0.0481531	0.0466705	0.0494211	0.048121	0.0487601	0.0491524	0.0442761	0.0494454	0.0484379	0.0418891	0.0420136	0.0492057	0.0467438	0.044952	0.0445999	0.0446871	0.0454438	0.0465701	0.0466268	0.0476159
Metabolism	Xenobiotics biodegradation and metabolism	ko00980	Metabolism of xenobiotics by cytochrome P450	0.000367279	0.000361391	0.000372642	0.000342392	0.000376952	0.000402406	0.000355289	0.000376153	0.000368354	0.000364981	0.000449378	0.00035784	0.000372326	0.000483801	0.000497507	0.000360566	0.000400441	0.000425745	0.000424526	0.000424026	0.000419141	0.00039875	0.00039689	0.000383032
Metabolism	Xenobiotics biodegradation and metabolism	ko00982	Drug metabolism - cytochrome P450	0.000362209	0.000356838	0.000369241	0.000338154	0.000372651	0.000399228	0.000350602	0.000371671	0.000364518	0.000362259	0.000451014	0.00035406	0.000369438	0.000490837	0.000504174	0.000356724	0.00039839	0.000425857	0.000427124	0.000426447	0.000420081	0.000397239	0.000395043	0.000380731
Metabolism	Xenobiotics biodegradation and metabolism	ko00983	Drug metabolism - other enzymes	0.00457634	0.00462497	0.00456754	0.00472391	0.00453187	0.00443227	0.00465093	0.00453901	0.00459083	0.0046481	0.0042874	0.00466186	0.00459654	0.00423898	0.00417914	0.00463866	0.00445389	0.00434211	0.00439266	0.00439271	0.00442222	0.00446386	0.00446171	0.00453717
Metabolism	Xenobiotics biodegradation and metabolism	ko00984	Steroid degradation	0.000460893	0.000465486	0.000450224	0.000476104	0.000436604	0.000438365	0.000469478	0.000463916	0.000425456	0.000422148	0.00033344	0.000468033	0.000455596	0.000405514	0.000262055	0.000449038	0.000437094	0.000420158	0.000413004	0.000404642	0.000437724	0.000429469	0.000444382	0.000449782
Metabolism	Lipid metabolism	ko01040	Biosynthesis of unsaturated fatty acids	0.00109533	0.00105854	0.00110275	0.000998057	0.00111334	0.00119649	0.00104415	0.00113374	0.0010565	0.00100271	0.00122814	0.0010285	0.00108605	0.00136249	0.00124687	0.00103617	0.0011795	0.00127747	0.00124633	0.00123718	0.00123303	0.00117838	0.00120205	0.00113449
Metabolism	Metabolism of terpenoids and polyketides	ko01051	Biosynthesis of ansamycins	0.000493546	0.000486723	0.000524903	0.000435079	0.000553472	0.000647176	0.000462536	0.000519466	0.000571994	0.000605887	0.00101822	0.000473088	0.000564921	0.00114163	0.00139177	0.000516484	0.000619449	0.000733091	0.00078595	0.000796974	0.000783875	0.000650983	0.000634485	0.000584221
Metabolism	Metabolism of terpenoids and polyketides	ko01053	Biosynthesis of siderophore group nonribosomal peptides	0.000274754	0.000296038	0.000318832	0.000239609	0.000302464	0.000512853	0.000256694	0.000351478	0.000295712	0.000362023	0.000872392	0.000306534	0.00043943	0.00155521	0.00138352	0.000288704	0.000482959	0.0006769	0.000679176	0.000659665	0.000867155	0.000471658	0.000545274	0.0004591
Metabolism	Metabolism of terpenoids and polyketides	ko01054	Nonribosomal peptide structures	0.00107156	0.00113229	0.00107798	0.000965666	0.00106202	0.001726	0.00101132	0.00130937	0.00101079	0.00117431	0.0024819	0.00111418	0.00153665	0.00475846	0.00383247	0.00102843	0.00151122	0.00203434	0.00181286	0.00173961	0.00277336	0.00142727	0.00180372	0.00152779
Metabolism	Metabolism of terpenoids and polyketides	ko01055	Biosynthesis of vancomycin group antibiotics	0.000353257	0.000351115	0.000361846	0.000354229	0.000364671	0.000357663	0.00035108	0.000353754	0.000369676	0.000363399	0.000394313	0.000350985	0.000361802	0.000373098	0.000402185	0.000358578	0.000361825	0.000379233	0.000358847	0.000360833	0.000370781	0.000360752	0.000372456	0.000364452
Metabolism	Metabolism of terpenoids and polyketides	ko01056	Biosynthesis of type II polyketide backbone	1.08557e-05	9.75669e-06	1.03503e-05	7.15857e-06	1.09261e-05	1.48073e-05	9.12123e-06	1.20806e-05	9.15262e-06	8.26328e-06	1.63166e-05	8.34467e-06	1.03836e-05	2.23446e-05	1.98636e-05	8.69635e-06	1.28984e-05	1.5241e-05	1.5836e-05	1.55872e-05	1.57519e-05	1.33947e-05	1.33443e-05	1.14218e-05
Metabolism	Metabolism of terpenoids and polyketides	ko01057	Biosynthesis of type II polyketide products	6.10044e-05	5.20244e-05	5.97401e-05	3.96528e-05	6.43076e-05	7.41449e-05	4.97854e-05	6.59136e-05	5.25134e-05	3.78839e-05	6.99594e-05	4.48214e-05	5.20888e-05	6.88384e-05	5.67814e-05	4.73079e-05	7.05442e-05	8.36285e-05	6.96529e-05	6.87403e-05	6.67642e-05	6.82016e-05	7.23655e-05	6.10562e-05
Environmental Information Processing	Membrane transport	ko02010	ABC transporters	0.111736	0.11165	0.111933	0.11191	0.112297	0.111018	0.111752	0.111283	0.112818	0.112571	0.11234	0.111671	0.111486	0.107502	0.111729	0.112204	0.111323	0.11101	0.110266	0.11058	0.109891	0.111302	0.111146	0.111372
Environmental Information Processing	Signal transduction	ko02020	Two-component system	0.0326919	0.0324381	0.0334159	0.0312981	0.0335152	0.0354581	0.0319977	0.0334048	0.0331418	0.0332352	0.0398938	0.032324	0.033592	0.0435478	0.0445168	0.032558	0.0354359	0.0376667	0.0380483	0.0379953	0.0377063	0.0354976	0.0354612	0.0343917
Cellular Processes	Cell motility	ko02030	Bacterial chemotaxis	0.000953331	0.000999208	0.00115013	0.000950542	0.00100632	0.00134391	0.000961034	0.00108736	0.000985702	0.00112739	0.00190065	0.00105491	0.00122989	0.00308716	0.00270019	0.00101805	0.00140533	0.00174707	0.00213	0.00208055	0.00196389	0.0014866	0.00144983	0.00133432
Cellular Processes	Cell motility	ko02040	Flagellar assembly	0.000371247	0.000383319	0.000690811	0.000273657	0.000448893	0.00104003	0.000341138	0.000602918	0.000370544	0.000531773	0.00185822	0.000372295	0.000743876	0.00370126	0.00305419	0.00039239	0.0010341	0.0016236	0.0024215	0.00234297	0.00196609	0.00129661	0.00118543	0.000939702
Environmental Information Processing	Membrane transport	ko02060	Phosphotransferase system (PTS)	0.0245457	0.0239139	0.0247671	0.0232657	0.0247372	0.0251512	0.0239326	0.0247486	0.0240842	0.023177	0.0247385	0.0232593	0.0237678	0.0236825	0.0236259	0.0236966	0.0247486	0.0253888	0.025485	0.0254768	0.024311	0.0251183	0.0249752	0.0243312
Genetic Information Processing	Translation	ko03008	Ribosome biogenesis in eukaryotes	0.000978314	0.00099084	0.000964026	0.00101587	0.000961272	0.000925062	0.000997455	0.000964053	0.000974331	0.000986003	0.000852147	0.00100209	0.00097147	0.000807265	0.000788514	0.000990142	0.000931894	0.000884753	0.000874397	0.000875096	0.000895724	0.000922897	0.000924748	0.00095172
Genetic Information Processing	Translation	ko03010	Ribosome	0.0290299	0.029268	0.0287571	0.0298415	0.0287667	0.02787	0.0294237	0.0286812	0.0291355	0.0293438	0.0266804	0.0294609	0.028894	0.0251544	0.0254193	0.029349	0.0279805	0.0270211	0.0268187	0.0268799	0.0272012	0.0278859	0.0279071	0.028459
Genetic Information Processing	Translation	ko03013	RNA transport	0.004019	0.0040413	0.00397832	0.00411701	0.00396636	0.00386018	0.00406574	0.00398349	0.00398991	0.00398915	0.00359685	0.00405445	0.00398655	0.00346898	0.00333717	0.00403123	0.00386436	0.00374786	0.0037016	0.00369982	0.00377237	0.00385069	0.00388018	0.0039374
Genetic Information Processing	Translation	ko03015	mRNA surveillance pathway	2.35198e-07	3.91998e-07	2.11547e-06	3.31106e-07	3.57226e-07	1.60264e-06	5.24043e-07	7.08415e-07	4.16335e-07	1.05074e-06	3.71289e-06	3.61331e-07	1.3295e-06	8.13347e-06	6.78547e-06	4.50348e-07	1.40097e-06	2.74666e-06	4.1415e-06	3.88199e-06	4.10778e-06	1.95897e-06	2.05445e-06	1.53433e-06
Genetic Information Processing	Folding, sorting and degradation	ko03018	RNA degradation	0.0172882	0.0173423	0.0171612	0.0175132	0.0170284	0.016897	0.0174155	0.0172478	0.0169798	0.0169831	0.0157392	0.0173563	0.0171541	0.0159757	0.0148712	0.0172104	0.0168676	0.0165344	0.0166118	0.0165539	0.0166863	0.0168649	0.0169102	0.0170513
Genetic Information Processing	Transcription	ko03020	RNA polymerase	0.00343422	0.00346288	0.00339385	0.00353684	0.00339503	0.00327805	0.00348364	0.00339016	0.00343593	0.00345532	0.00308917	0.00348667	0.00340948	0.00289645	0.00289207	0.0034678	0.00329279	0.00316564	0.0031297	0.0031357	0.00318256	0.00327651	0.00328431	0.00335476
Genetic Information Processing	Transcription	ko03022	Basal transcription factors	0.000233765	0.000180988	0.000236873	0.000111087	0.000249023	0.000325005	0.000171508	0.000267091	0.000182157	0.000107732	0.000315146	0.000128497	0.000188925	0.000360055	0.000277602	0.000153416	0.00028663	0.000372142	0.000360038	0.000353643	0.000305314	0.000305315	0.000313373	0.000241828
Genetic Information Processing	Replication and repair	ko03030	DNA replication	0.0105637	0.0106655	0.0104393	0.0108846	0.0104048	0.0101073	0.0107275	0.0104451	0.0105116	0.010598	0.00944668	0.0107415	0.0105015	0.00910828	0.0088864	0.0106511	0.0101331	0.00973338	0.00967172	0.00967321	0.00986605	0.0100821	0.0101064	0.0103269
Genetic Information Processing	Transcription	ko03040	Spliceosome	2.82884e-08	5.37448e-08	3.46441e-08	1.1775e-08	4.22003e-08	1.67135e-07	1.59401e-08	7.47721e-08	3.38048e-08	7.53357e-08	3.71693e-07	9.12085e-08	1.38486e-07	8.31645e-07	6.78742e-07	4.14091e-08	1.79653e-07	2.8859e-07	1.57146e-07	1.40557e-07	3.92164e-07	9.96435e-08	1.87096e-07	1.45843e-07
Genetic Information Processing	Folding, sorting and degradation	ko03050	Proteasome	7.72539e-06	5.449e-06	6.51319e-06	1.99871e-06	8.70571e-06	1.14445e-05	4.71349e-06	8.73977e-06	6.25714e-06	3.14641e-06	1.26837e-05	3.20124e-06	5.47569e-06	1.08505e-05	1.21499e-05	4.47383e-06	9.471e-06	1.23031e-05	9.76193e-06	9.89039e-06	9.17155e-06	9.54552e-06	9.95017e-06	7.22205e-06
Genetic Information Processing	Folding, sorting and degradation	ko03060	Protein export	0.00804902	0.00811278	0.00800061	0.00822421	0.00801363	0.00783057	0.00813847	0.00796628	0.00811896	0.00821139	0.00772718	0.00817017	0.00803972	0.00736199	0.00762552	0.00815389	0.00786631	0.00765137	0.00767887	0.00770111	0.00769823	0.00785563	0.00780438	0.00794336
Environmental Information Processing	Membrane transport	ko03070	Bacterial secretion system	0.00734839	0.00736113	0.0073609	0.00735769	0.00740741	0.00730501	0.00734736	0.00731769	0.007426	0.00742228	0.00741257	0.00743904	0.00733301	0.0070575	0.00735999	0.0074064	0.00744954	0.00741434	0.00729732	0.00731945	0.00720323	0.00735236	0.00730862	0.00735959
Organismal Systems	Endocrine system	ko03320	PPAR signaling pathway	0.000724376	0.000706437	0.000728332	0.000671539	0.000734203	0.000783384	0.000697951	0.000744229	0.000707099	0.000685959	0.000816807	0.000690326	0.000721964	0.000893517	0.000853659	0.000695584	0.000770288	0.000819753	0.000810484	0.00080593	0.000805235	0.000771103	0.000778528	0.000744922
Genetic Information Processing	Replication and repair	ko03410	Base excision repair	0.00866583	0.00867526	0.00860458	0.00873289	0.00859335	0.00849541	0.00870187	0.00862885	0.0085916	0.00857832	0.00812173	0.0086734	0.00858659	0.00795984	0.00777925	0.00864556	0.00848483	0.00833543	0.00832502	0.00832044	0.00833452	0.00848028	0.00847972	0.0085432
Genetic Information Processing	Replication and repair	ko03420	Nucleotide excision repair	0.0196696	0.019754	0.0193951	0.0201213	0.0192397	0.0187642	0.0199043	0.0195184	0.0192117	0.0191305	0.0166284	0.0197796	0.0193529	0.0163051	0.0147321	0.0195606	0.0187378	0.0180286	0.0178396	0.0177755	0.018146	0.0186573	0.0188155	0.0191158
Genetic Information Processing	Replication and repair	ko03430	Mismatch repair	0.0197937	0.0199667	0.0195369	0.0204124	0.0194418	0.0188358	0.0201068	0.0195695	0.0196023	0.0196903	0.0172473	0.0200819	0.0196135	0.0165884	0.0158281	0.0198966	0.0188634	0.0180744	0.0178818	0.0178705	0.0183002	0.0187637	0.0188745	0.0192805
Genetic Information Processing	Replication and repair	ko03440	Homologous recombination	0.0209414	0.0211058	0.0207008	0.0215674	0.0206876	0.0199488	0.0212393	0.0206812	0.0208998	0.0209668	0.0186124	0.0212601	0.0207641	0.017459	0.0171871	0.0211123	0.0200762	0.0193103	0.0189762	0.0189975	0.0193412	0.0199288	0.0200335	0.0204515
Genetic Information Processing	Replication and repair	ko03450	Non-homologous end-joining	3.49937e-06	5.95708e-06	7.71417e-06	3.41683e-06	5.18376e-06	2.19163e-05	3.24474e-06	9.81317e-06	5.36935e-06	1.18079e-05	4.98743e-05	7.52953e-06	1.85576e-05	0.000109853	9.09452e-05	5.88562e-06	2.0321e-05	3.62674e-05	4.12245e-05	3.91236e-05	5.3404e-05	2.10997e-05	2.63168e-05	1.9791e-05
Genetic Information Processing	Replication and repair	ko03460	Fanconi anemia pathway	6.61417e-05	6.71891e-05	6.38316e-05	7.05816e-05	6.20566e-05	5.84126e-05	6.85238e-05	6.49389e-05	6.17359e-05	6.17243e-05	3.92103e-05	6.77861e-05	6.35772e-05	3.88452e-05	2.35011e-05	6.54943e-05	5.8616e-05	5.21259e-05	5.3742e-05	5.3032e-05	5.35747e-05	5.86032e-05	5.86755e-05	6.17201e-05
Environmental Information Processing	Signal transduction	ko04011	MAPK signaling pathway - yeast	0.000176259	0.000177336	0.000212022	0.000161499	0.000201979	0.000245015	0.000170613	0.000190132	0.000209748	0.000231871	0.000404324	0.000178007	0.000214268	0.000489903	0.000569968	0.000193093	0.000246505	0.000301533	0.00036372	0.000364903	0.000320871	0.000268778	0.000248928	0.000229568
Environmental Information Processing	Signal transduction	ko04020	Calcium signaling pathway	4.69201e-06	4.28775e-06	4.78231e-06	3.71972e-06	4.61779e-06	5.51108e-06	4.24565e-06	5.05734e-06	3.93729e-06	3.4084e-06	4.81537e-06	3.81983e-06	4.3209e-06	6.32222e-06	4.42642e-06	3.91758e-06	5.12077e-06	5.80197e-06	6.31342e-06	6.17905e-06	5.53578e-06	5.43834e-06	5.38701e-06	4.79452e-06
Environmental Information Processing	Signal transduction	ko04070	Phosphatidylinositol signaling system	0.000668702	0.000656599	0.000666685	0.000635352	0.000687233	0.000696738	0.000650147	0.000671168	0.000683102	0.000670603	0.000762277	0.000647074	0.000662839	0.000711182	0.000798536	0.000661657	0.000690399	0.000712124	0.000693714	0.000699218	0.000686959	0.000690267	0.000687415	0.000672684
Environmental Information Processing	Signaling molecules and interaction	ko04080	Neuroactive ligand-receptor interaction	0	0	0	2.84486e-09	0	0	1.36509e-09	0	2.02787e-09	0	4.54326e-09	0	8.59006e-09	0	0	2.1523e-09	0	0	0	0	0	2.15997e-09	0	0
Cellular Processes	Cell growth and death	ko04112	Cell cycle - Caulobacter	0.0129238	0.0130462	0.0128766	0.0132614	0.0128072	0.0125996	0.0130945	0.0128447	0.0129323	0.0130757	0.0122296	0.0131527	0.0129838	0.0122205	0.0119864	0.0130616	0.0126627	0.0123947	0.0124273	0.01242	0.0125895	0.0126322	0.0126542	0.0128354
Cellular Processes	Cell growth and death	ko04113	Meiosis - yeast	0.000928247	0.000867136	0.000881844	0.000781635	0.000902229	0.0010224	0.000852963	0.000979269	0.000798126	0.000696758	0.000850254	0.000794086	0.000868182	0.00107326	0.000724388	0.000794297	0.000939821	0.00102365	0.000925243	0.000903432	0.00100838	0.000932196	0.00100309	0.000910735
Cellular Processes	Cell growth and death	ko04115	p53 signaling pathway	6.58664e-09	1.23408e-08	1.60046e-08	1.9998e-08	1.26206e-08	1.87902e-08	1.4253e-08	9.88581e-09	1.97188e-08	1.79439e-08	6.48953e-08	2.86532e-08	5.46463e-08	7.1991e-08	7.27249e-08	2.49565e-08	4.31578e-08	4.95291e-08	4.46255e-08	4.30566e-08	3.32067e-08	3.57652e-08	1.9776e-08	2.42091e-08
Genetic Information Processing	Folding, sorting and degradation	ko04122	Sulfur relay system	0.0044012	0.004428	0.00440943	0.00444298	0.00436415	0.00442013	0.00442906	0.00441904	0.00436114	0.00441083	0.00436604	0.00444556	0.00444263	0.00467033	0.00444332	0.00440951	0.00441577	0.00441422	0.00450976	0.00449173	0.00451779	0.00442876	0.00442377	0.00443371
Genetic Information Processing	Folding, sorting and degradation	ko04141	Protein processing in endoplasmic reticulum	0.000747856	0.00073768	0.000721048	0.000735327	0.000707106	0.000723657	0.000743337	0.000757601	0.000669538	0.000638665	0.00052112	0.0007202	0.000713347	0.00061719	0.000367181	0.000699478	0.000700144	0.000681615	0.000658852	0.000644441	0.000692367	0.00069421	0.000721474	0.000713574
Cellular Processes	Transport and catabolism	ko04142	Lysosome	0.000199644	0.000180571	0.000197226	0.000142605	0.000288786	0.000251297	0.000162337	0.000175897	0.000338165	0.000335736	0.000619686	0.000167417	0.000204907	0.000240337	0.000832772	0.00024084	0.000244666	0.000278711	0.000216686	0.000257089	0.00020518	0.000248664	0.000219122	0.000206129
Cellular Processes	Transport and catabolism	ko04144	Endocytosis	8.03993e-09	1.80126e-08	1.18271e-08	7.75342e-09	1.34166e-08	2.80261e-08	8.25352e-09	1.47752e-08	7.9974e-09	1.34795e-08	5.57324e-08	4.74629e-08	2.92101e-08	1.21952e-07	8.91279e-08	1.74683e-08	6.50936e-08	7.48629e-08	2.5518e-08	2.13135e-08	5.37664e-08	2.17596e-08	2.86303e-08	3.37226e-08
Cellular Processes	Transport and catabolism	ko04146	Peroxisome	0.000854257	0.000859805	0.000884972	0.000839416	0.000888088	0.000936517	0.000846418	0.000870528	0.000900446	0.000931474	0.0011409	0.000870444	0.00090779	0.00124842	0.00134998	0.000879347	0.000946851	0.00101278	0.00104051	0.00104252	0.00103407	0.000950912	0.000943045	0.000922007
Cellular Processes	Cell growth and death	ko04210	Apoptosis	1.7059e-07	3.87286e-07	4.81581e-07	2.44459e-07	2.95528e-07	5.21737e-07	3.58897e-07	3.89986e-07	1.58614e-07	4.52509e-07	9.67511e-07	1.03304e-06	5.66234e-07	2.16741e-06	1.57315e-06	3.95585e-07	1.42308e-06	1.56946e-06	9.50637e-07	8.75941e-07	9.54687e-07	6.05098e-07	5.48345e-07	7.19763e-07
Organismal Systems	Circulatory system	ko04260	Cardiac muscle contraction	0.000184553	0.000187567	0.000179905	0.000197664	0.000174178	0.000162792	0.000191297	0.000181543	0.000173365	0.000171796	0.000110626	0.000189975	0.000179039	0.000110284	6.42724e-05	0.000183063	0.000165048	0.000149402	0.000144879	0.000142782	0.000151904	0.000161976	0.000166691	0.000174013
Environmental Information Processing	Signal transduction	ko04310	Wnt signaling pathway	8.77284e-07	8.79175e-07	8.73814e-07	8.99409e-07	8.8721e-07	8.55412e-07	8.78615e-07	8.76698e-07	8.87472e-07	8.74778e-07	8.37065e-07	9.01955e-07	8.8779e-07	8.03362e-07	7.61835e-07	8.88924e-07	9.00109e-07	9.13565e-07	8.79696e-07	8.7835e-07	8.62058e-07	8.8242e-07	8.95574e-07	8.96677e-07
Environmental Information Processing	Signal transduction	ko04330	Notch signaling pathway	8.77284e-07	8.79175e-07	8.73814e-07	8.99409e-07	8.8721e-07	8.55412e-07	8.78615e-07	8.76698e-07	8.87472e-07	8.74778e-07	8.37065e-07	9.01955e-07	8.8779e-07	8.03362e-07	7.61835e-07	8.88924e-07	9.00109e-07	9.13565e-07	8.79696e-07	8.7835e-07	8.62058e-07	8.8242e-07	8.95574e-07	8.96677e-07
Environmental Information Processing	Signal transduction	ko04370	VEGF signaling pathway	4.69201e-06	4.28775e-06	4.78231e-06	3.71972e-06	4.61779e-06	5.51108e-06	4.24565e-06	5.05734e-06	3.93729e-06	3.4084e-06	4.81537e-06	3.81983e-06	4.3209e-06	6.32222e-06	4.42642e-06	3.91758e-06	5.12077e-06	5.80197e-06	6.31342e-06	6.17905e-06	5.53578e-06	5.43834e-06	5.38701e-06	4.79452e-06
Cellular Processes	Cellular community - eukaryotes	ko04510	Focal adhesion	5.4831e-06	3.8949e-06	5.96292e-06	2.08442e-06	8.20488e-06	8.62669e-06	3.30178e-06	5.96398e-06	7.75558e-06	5.49512e-06	1.67665e-05	2.81384e-06	5.30019e-06	1.04654e-05	1.92735e-05	4.86061e-06	8.59246e-06	1.25799e-05	9.88172e-06	1.0516e-05	8.67335e-06	8.82803e-06	9.40697e-06	6.98818e-06
Environmental Information Processing	Signaling molecules and interaction	ko04512	ECM-receptor interaction	5.4831e-06	3.8949e-06	5.96292e-06	2.08442e-06	8.20488e-06	8.62669e-06	3.30178e-06	5.96398e-06	7.75558e-06	5.49512e-06	1.67665e-05	2.81384e-06	5.30019e-06	1.04654e-05	1.92735e-05	4.86061e-06	8.59246e-06	1.25799e-05	9.88172e-06	1.0516e-05	8.67335e-06	8.82803e-06	9.40697e-06	6.98818e-06
Organismal Systems	Immune system	ko04610	Complement and coagulation cascades	2.00207e-08	5.00746e-08	5.24737e-08	2.04187e-08	3.61223e-08	3.26491e-08	3.61415e-08	3.31109e-08	5.16407e-09	1.844e-08	2.83456e-08	1.53433e-07	3.0239e-08	8.54981e-08	2.40373e-08	4.71361e-08	1.88855e-07	1.7277e-07	2.70349e-08	1.75384e-08	2.38696e-08	3.44172e-08	2.44877e-08	6.92374e-08
Organismal Systems	Immune system	ko04612	Antigen processing and presentation	4.48458e-06	4.39321e-06	7.20133e-06	2.80557e-06	4.92402e-06	1.1328e-05	3.98326e-06	6.82393e-06	3.70599e-06	5.24107e-06	1.81859e-05	3.97713e-06	7.36767e-06	3.64551e-05	2.98348e-05	4.13374e-06	1.08746e-05	1.61446e-05	2.55984e-05	2.48197e-05	1.93735e-05	1.38812e-05	1.17979e-05	9.50214e-06
Organismal Systems	Endocrine system	ko04614	Renin-angiotensin system	0.00017693	0.000161908	0.000175492	0.000140304	0.00021954	0.00020475	0.000152528	0.000170915	0.000230247	0.000213315	0.000351871	0.000155398	0.00017338	0.000186144	0.000414884	0.000185617	0.0002087	0.000237448	0.000192222	0.000207266	0.000181837	0.000204418	0.00019907	0.000184429
Organismal Systems	Immune system	ko04621	NOD-like receptor signaling pathway	5.75832e-05	6.13745e-05	8.38315e-05	4.82625e-05	0.000133489	0.000124426	4.85846e-05	4.28434e-05	0.000197042	0.000242759	0.000516518	6.52858e-05	0.000107671	0.00032493	0.000827109	0.000127086	0.000127545	0.000170248	0.000232724	0.00026213	0.000167171	0.000163683	0.000107691	0.000105941
Organismal Systems	Immune system	ko04622	RIG-I-like receptor signaling pathway	0.000247946	0.000239698	0.000245584	0.000227083	0.000251963	0.0002636	0.000237723	0.000250975	0.000244907	0.00023722	0.000276487	0.000230152	0.000239718	0.000266758	0.000286552	0.000237957	0.000254235	0.000263257	0.0002725	0.00027327	0.000254864	0.000261661	0.000254573	0.000246026
Organismal Systems	Environmental adaptation	ko04626	Plant-pathogen interaction	0.002526	0.00252149	0.00249748	0.00253359	0.00250659	0.002466	0.00252919	0.00251147	0.00250206	0.00248358	0.0023371	0.00251534	0.00248697	0.00222665	0.00219516	0.00251067	0.00245978	0.00240949	0.0023713	0.0023727	0.00238677	0.00245022	0.00245701	0.00247387
Organismal Systems	Immune system	ko04640	Hematopoietic cell lineage	0.000101223	0.000101624	9.69177e-05	0.000104333	0.000102664	9.29714e-05	0.000102065	9.70637e-05	0.000107308	0.000107329	9.62371e-05	0.000101853	9.88011e-05	6.30202e-05	9.11087e-05	0.000104487	9.25974e-05	8.54143e-05	7.85213e-05	8.0828e-05	8.26579e-05	9.1676e-05	9.12556e-05	9.50159e-05
Organismal Systems	Immune system	ko04666	Fc gamma R-mediated phagocytosis	4.70005e-06	4.30576e-06	4.79414e-06	3.72839e-06	4.63121e-06	5.5391e-06	4.25435e-06	5.07212e-06	3.94594e-06	3.42188e-06	4.87256e-06	3.86729e-06	4.35287e-06	6.44417e-06	4.51555e-06	3.93574e-06	5.18587e-06	5.87684e-06	6.33894e-06	6.20036e-06	5.58954e-06	5.46079e-06	5.41564e-06	4.82824e-06
Organismal Systems	Nervous system	ko04721	Synaptic vesicle cycle	1.13166e-06	8.11192e-07	1.02141e-06	3.57251e-07	1.37709e-06	1.93124e-06	6.81524e-07	1.36348e-06	1.09112e-06	6.92139e-07	2.77944e-06	4.74423e-07	1.08623e-06	3.11558e-06	3.31228e-06	7.51423e-07	1.60324e-06	2.36501e-06	2.22747e-06	2.24869e-06	2.1466e-06	1.78457e-06	1.91307e-06	1.36312e-06
Organismal Systems	Nervous system	ko04723	Retrograde endocannabinoid signaling	9.37579e-06	1.13037e-05	1.57764e-05	1.03815e-05	1.06885e-05	2.34919e-05	1.01347e-05	1.45532e-05	1.08985e-05	1.71032e-05	4.40772e-05	1.24589e-05	2.11642e-05	9.2121e-05	7.4966e-05	1.16478e-05	2.31445e-05	3.63159e-05	4.66034e-05	4.46212e-05	4.9037e-05	2.61116e-05	2.82964e-05	2.31794e-05
Organismal Systems	Nervous system	ko04724	Glutamatergic synapse	0.000317517	0.000320261	0.00031542	0.000327919	0.000311707	0.000303911	0.000322492	0.000315771	0.000312416	0.000311896	0.000275247	0.000322974	0.000316835	0.000278395	0.000248905	0.000318247	0.000306447	0.000298293	0.000291533	0.000290084	0.000301359	0.000303147	0.000308762	0.000313101
Organismal Systems	Nervous system	ko04725	Cholinergic synapse	6.50703e-07	1.13133e-06	1.76783e-06	1.09718e-06	1.1492e-06	2.93068e-06	8.46812e-07	1.37654e-06	1.20185e-06	2.50708e-06	6.91355e-06	1.91905e-06	2.41315e-06	1.36332e-05	1.22485e-05	1.6002e-06	4.03822e-06	5.96103e-06	1.07056e-05	1.04995e-05	6.77151e-06	5.09366e-06	3.69233e-06	3.36628e-06
Organismal Systems	Nervous system	ko04726	Serotonergic synapse	3.40096e-07	6.18713e-07	1.03815e-06	4.50209e-07	5.27794e-07	1.95581e-06	4.27943e-07	9.0344e-07	5.07643e-07	1.21774e-06	4.34438e-06	9.35578e-07	1.62896e-06	9.67718e-06	7.91046e-06	6.95022e-07	2.22463e-06	3.60216e-06	4.9427e-06	4.71949e-06	4.71999e-06	2.41335e-06	2.40391e-06	1.96817e-06
Organismal Systems	Nervous system	ko04727	GABAergic synapse	0.000347534	0.000346352	0.000348664	0.000345816	0.000341548	0.00034936	0.000347634	0.000350945	0.000334921	0.000332779	0.000323729	0.000344002	0.000344842	0.000354743	0.00031028	0.000341092	0.000347342	0.000348562	0.000363997	0.000360925	0.00035181	0.000352138	0.000349844	0.000347797
Organismal Systems	Nervous system	ko04728	Dopaminergic synapse	5.13953e-07	7.86002e-07	1.21632e-06	5.73511e-07	9.70778e-07	2.2303e-06	5.53183e-07	9.68353e-07	1.19406e-06	2.00912e-06	5.88348e-06	1.10723e-06	1.88361e-06	1.00111e-05	1.02989e-05	1.09981e-06	2.48935e-06	3.89595e-06	5.19867e-06	5.09825e-06	4.90176e-06	2.73298e-06	2.56532e-06	2.16635e-06
Organismal Systems	Endocrine system	ko04910	Insulin signaling pathway	0.000719587	0.000658254	0.000723773	0.000581716	0.000841052	0.000820526	0.000634916	0.000710701	0.000858685	0.000787992	0.00123457	0.000609144	0.000697273	0.000769024	0.00140268	0.000716483	0.000794785	0.000901914	0.000766012	0.000807403	0.000751919	0.000802133	0.00080195	0.000733023
Organismal Systems	Endocrine system	ko04912	GnRH signaling pathway	8.03993e-09	1.80126e-08	1.18271e-08	7.75342e-09	1.34166e-08	2.80261e-08	8.25352e-09	1.47752e-08	7.9974e-09	1.34795e-08	5.57324e-08	4.74629e-08	2.92101e-08	1.21952e-07	8.91279e-08	1.74683e-08	6.50936e-08	7.48629e-08	2.5518e-08	2.13135e-08	5.37664e-08	2.17596e-08	2.86303e-08	3.37226e-08
Organismal Systems	Endocrine system	ko04914	Progesterone-mediated oocyte maturation	4.48458e-06	4.39321e-06	7.20133e-06	2.80557e-06	4.92402e-06	1.1328e-05	3.98326e-06	6.82393e-06	3.70599e-06	5.24107e-06	1.81859e-05	3.97713e-06	7.36767e-06	3.64551e-05	2.98348e-05	4.13374e-06	1.08746e-05	1.61446e-05	2.55984e-05	2.48197e-05	1.93735e-05	1.38812e-05	1.17979e-05	9.50214e-06
Organismal Systems	Endocrine system	ko04916	Melanogenesis	2.96858e-08	5.92615e-08	1.5972e-07	6.79835e-08	5.19666e-08	1.10131e-07	6.29603e-08	5.88021e-08	4.14966e-08	1.1427e-07	2.12562e-07	1.22825e-07	8.81646e-08	4.85254e-07	3.67726e-07	8.96132e-08	2.40327e-07	3.05671e-07	6.37842e-07	6.14867e-07	2.45287e-07	2.90305e-07	1.52626e-07	1.67739e-07
Organismal Systems	Endocrine system	ko04920	Adipocytokine signaling pathway	3.90997e-05	4.22158e-05	5.18558e-05	3.62738e-05	4.76555e-05	7.08269e-05	3.77552e-05	4.79785e-05	4.91988e-05	6.00487e-05	0.000132698	4.68291e-05	6.17319e-05	0.000204706	0.000205138	4.62238e-05	7.47256e-05	0.000102062	0.000114835	0.000113001	0.000116489	7.61272e-05	7.71625e-05	6.77403e-05
Human Diseases	Endocrine and metabolic disease	ko04930	Type II diabetes mellitus	0.000326332	0.000329946	0.000322296	0.000337412	0.000320209	0.000310824	0.000332123	0.000322589	0.000323207	0.000326384	0.000285405	0.000332718	0.00032402	0.000277655	0.000265113	0.000328923	0.000312068	0.000298223	0.000298097	0.000297796	0.000302914	0.000310519	0.000310768	0.000318445
Human Diseases	Endocrine and metabolic disease	ko04940	Type I diabetes mellitus	0.000514461	0.000515207	0.000511412	0.000518298	0.00050856	0.000505952	0.000517332	0.000512537	0.00050811	0.000510162	0.000482268	0.000514074	0.000508906	0.000478835	0.000467262	0.000513123	0.000503759	0.000493036	0.000509868	0.00050938	0.000496052	0.0005092	0.00050188	0.000506837
Organismal Systems	Excretory system	ko04960	Aldosterone-regulated sodium reabsorption	0.000184292	0.000187084	0.000179229	0.000197333	0.000173762	0.000161382	0.000190986	0.000180885	0.000172963	0.000170927	0.00010742	0.000189168	0.000177764	0.000103401	5.85656e-05	0.000182522	0.000163347	0.000146758	0.000141768	0.000139817	0.000148578	0.000160372	0.000165005	0.000172602
Organismal Systems	Excretory system	ko04961	Endocrine and other factor-regulated calcium reabsorption	0.000184292	0.000187084	0.000179229	0.000197334	0.000173762	0.000161382	0.000190987	0.000180885	0.000172963	0.000170927	0.00010742	0.000189168	0.000177765	0.000103401	5.85656e-05	0.000182523	0.000163347	0.000146758	0.000141768	0.000139817	0.000148578	0.000160373	0.000165005	0.000172602
Organismal Systems	Excretory system	ko04962	Vasopressin-regulated water reabsorption	1.13166e-06	8.11192e-07	1.02141e-06	3.57251e-07	1.37709e-06	1.93124e-06	6.81524e-07	1.36348e-06	1.09112e-06	6.92139e-07	2.77944e-06	4.74423e-07	1.08623e-06	3.11558e-06	3.31228e-06	7.51423e-07	1.60324e-06	2.36501e-06	2.22747e-06	2.24869e-06	2.1466e-06	1.78457e-06	1.91307e-06	1.36312e-06
Organismal Systems	Excretory system	ko04964	Proximal tubule bicarbonate reclamation	0.000249693	0.000257137	0.000245761	0.000273749	0.000234578	0.000222085	0.000262231	0.000246544	0.00023637	0.000240259	0.000158528	0.000262834	0.000249426	0.000180988	0.000110769	0.000251762	0.000225439	0.000205781	0.000204849	0.000201173	0.000220168	0.000222051	0.000229789	0.000240623
Organismal Systems	Digestive system	ko04970	Salivary secretion	0.000184292	0.000187084	0.000179229	0.000197333	0.000173762	0.000161382	0.000190986	0.000180885	0.000172963	0.000170927	0.00010742	0.000189168	0.000177764	0.000103401	5.85656e-05	0.000182522	0.000163347	0.000146758	0.000141768	0.000139817	0.000148578	0.000160372	0.000165005	0.000172602
Organismal Systems	Digestive system	ko04971	Gastric acid secretion	0.000184292	0.000187084	0.000179229	0.000197333	0.000173762	0.000161382	0.000190986	0.000180885	0.000172963	0.000170927	0.00010742	0.000189168	0.000177764	0.000103401	5.85656e-05	0.000182522	0.000163347	0.000146758	0.000141768	0.000139817	0.000148578	0.000160372	0.000165005	0.000172602
Organismal Systems	Digestive system	ko04972	Pancreatic secretion	0.000184292	0.000187084	0.000179229	0.000197336	0.000173762	0.000161382	0.000190988	0.000180885	0.000172965	0.000170927	0.000107424	0.000189168	0.000177772	0.000103401	5.85656e-05	0.000182525	0.000163347	0.000146758	0.000141768	0.000139817	0.000148578	0.000160375	0.000165005	0.000172602
Organismal Systems	Digestive system	ko04973	Carbohydrate digestion and absorption	0.000624523	0.000617535	0.000600542	0.000596683	0.000722548	0.000642663	0.000599798	0.000576608	0.000811729	0.000836894	0.00108358	0.000611045	0.00063421	0.000556824	0.00135191	0.000700791	0.000629729	0.000620155	0.000562321	0.000616757	0.000565324	0.000639408	0.00059066	0.000606853
Organismal Systems	Digestive system	ko04974	Protein digestion and absorption	0.000316874	0.000315124	0.000308703	0.000321034	0.000312186	0.000300771	0.00031744	0.00031432	0.000310815	0.00030216	0.000265318	0.000312555	0.000309571	0.000243714	0.000221532	0.000312373	0.000298547	0.000290803	0.000275071	0.000274906	0.000286724	0.000296679	0.000305306	0.000306244
Organismal Systems	Digestive system	ko04975	Fat digestion and absorption	3.9649e-10	9.91678e-10	6.13491e-10	1.1918e-09	7.15368e-10	6.46583e-10	7.9218e-10	4.63997e-10	7.53115e-10	3.65187e-10	2.01952e-09	3.03859e-09	3.22939e-09	1.69321e-09	4.76036e-10	1.62427e-09	3.7401e-09	3.42154e-09	5.354e-10	3.47331e-10	4.72714e-10	1.37484e-09	4.84955e-10	1.37118e-09
Organismal Systems	Digestive system	ko04976	Bile secretion	0.000192728	0.000195682	0.000187188	0.000205676	0.000181475	0.000169891	0.000199506	0.000189509	0.000180392	0.000179248	0.000113857	0.000197813	0.000186259	0.00011301	6.49222e-05	0.0001905	0.000171511	0.000154405	0.000148835	0.000146635	0.000157195	0.000167988	0.000172954	0.000180699
Organismal Systems	Digestive system	ko04978	Mineral absorption	0.000369549	0.000380297	0.00037423	0.000401493	0.00035599	0.000340328	0.000386045	0.000366956	0.00035829	0.000364781	0.000277589	0.000393685	0.00037409	0.000310641	0.000227786	0.0003775	0.000356915	0.000339891	0.000346626	0.000341513	0.000346979	0.000351193	0.000355734	0.000369404
Human Diseases	Neurodegenerative disease	ko05010	Alzheimer disease	0.00130135	0.00128815	0.00130218	0.00126827	0.00132483	0.00133013	0.00128183	0.00130287	0.00132449	0.00130949	0.00141476	0.00127686	0.00129808	0.00134698	0.00145793	0.00129689	0.00132181	0.00134922	0.00132127	0.00132837	0.00132403	0.00132268	0.00132531	0.00130748
Human Diseases	Neurodegenerative disease	ko05012	Parkinson disease	0.000132294	0.000139606	0.00012877	0.00015118	0.000134097	0.000116284	0.000140876	0.000124117	0.000149888	0.000161852	0.000136503	0.00014589	0.000139392	9.86531e-05	0.000150886	0.000148058	0.00011884	0.000104293	0.000101124	0.000104892	0.000114267	0.000117901	0.00011647	0.000127989
Human Diseases	Neurodegenerative disease	ko05014	Amyotrophic lateral sclerosis (ALS)	3.48794e-05	3.39e-05	4.23619e-05	2.33743e-05	3.61624e-05	6.59746e-05	3.02388e-05	4.57336e-05	2.87041e-05	3.29635e-05	9.22624e-05	3.20086e-05	4.66012e-05	0.000175666	0.000140205	3.02135e-05	6.20095e-05	8.53011e-05	0.000105533	0.000101713	9.96767e-05	6.71423e-05	6.62226e-05	5.45739e-05
Human Diseases	Neurodegenerative disease	ko05016	Huntington disease	4.39271e-05	4.46313e-05	6.3247e-05	3.45442e-05	7.10898e-05	8.43217e-05	3.79129e-05	4.78929e-05	8.3534e-05	9.58709e-05	0.000220518	4.93861e-05	6.96349e-05	0.000218527	0.000334275	6.2784e-05	9.25137e-05	0.000127731	0.000138958	0.000144401	0.000124534	9.71679e-05	8.83376e-05	7.79226e-05
Human Diseases	Neurodegenerative disease	ko05020	Prion diseases	1.82548e-06	1.52194e-06	3.0462e-06	9.61824e-07	2.64019e-06	5.3821e-06	1.23494e-06	3.13633e-06	2.25595e-06	2.14481e-06	1.03619e-05	1.07591e-06	3.95552e-06	1.87705e-05	1.55959e-05	1.62535e-06	4.88534e-06	8.9395e-06	9.96557e-06	9.63975e-06	1.05181e-05	5.81787e-06	6.94346e-06	4.85255e-06
Human Diseases	Substance dependence	ko05030	Cocaine addiction	3.40096e-07	6.18713e-07	1.03815e-06	4.50209e-07	5.27794e-07	1.95581e-06	4.27943e-07	9.0344e-07	5.07643e-07	1.21774e-06	4.34438e-06	9.35578e-07	1.62896e-06	9.67718e-06	7.91046e-06	6.95022e-07	2.22463e-06	3.60216e-06	4.9427e-06	4.71949e-06	4.71999e-06	2.41335e-06	2.40391e-06	1.96817e-06
Human Diseases	Substance dependence	ko05031	Amphetamine addiction	3.40096e-07	6.18713e-07	1.03815e-06	4.50209e-07	5.27794e-07	1.95581e-06	4.27943e-07	9.0344e-07	5.07643e-07	1.21774e-06	4.34438e-06	9.35578e-07	1.62896e-06	9.67718e-06	7.91046e-06	6.95022e-07	2.22463e-06	3.60216e-06	4.9427e-06	4.71949e-06	4.71999e-06	2.41335e-06	2.40391e-06	1.96817e-06
Human Diseases	Substance dependence	ko05032	Morphine addiction	3.75083e-05	3.0283e-05	2.98513e-05	1.8434e-05	3.57405e-05	4.6606e-05	2.83456e-05	4.05977e-05	2.5757e-05	1.62874e-05	3.31582e-05	2.16046e-05	2.65021e-05	3.43022e-05	2.37451e-05	2.36317e-05	3.64004e-05	3.92937e-05	3.36972e-05	3.31742e-05	3.37951e-05	3.68399e-05	3.71024e-05	3.01966e-05
Human Diseases	Substance dependence	ko05034	Alcoholism	4.0601e-07	7.83573e-07	1.1599e-06	5.12023e-07	6.4672e-07	2.0633e-06	5.08221e-07	9.89478e-07	5.31518e-07	1.27845e-06	4.4531e-06	1.44073e-06	1.74248e-06	9.95866e-06	7.9896e-06	8.57503e-07	2.8464e-06	4.17097e-06	5.03171e-06	4.77723e-06	4.79857e-06	2.53398e-06	2.48453e-06	2.19612e-06
Human Diseases	Infectious disease: bacterial	ko05100	Bacterial invasion of epithelial cells	0.000381144	0.00043139	0.000776322	0.00037689	0.000638045	0.000934878	0.000393913	0.00047949	0.000755211	0.00102512	0.00242738	0.000511633	0.000745643	0.00307381	0.00393474	0.000642484	0.00109987	0.00155468	0.00250823	0.00252576	0.00163047	0.00139264	0.00102371	0.000930846
Human Diseases	Infectious disease: bacterial	ko05110	Vibrio cholerae infection	1.78545e-06	3.22401e-06	7.25751e-06	2.62173e-06	2.80648e-06	1.00796e-05	2.62972e-06	4.67136e-06	2.70711e-06	6.79422e-06	2.22804e-05	4.83974e-06	8.3024e-06	4.96809e-05	4.05931e-05	3.79415e-06	1.18596e-05	1.91043e-05	2.87873e-05	2.75311e-05	2.44504e-05	1.379e-05	1.26316e-05	1.05218e-05
Cellular Processes	Cellular community - prokaryotes	ko05111	Biofilm formation - Vibrio cholerae	0.00103351	0.00104051	0.00104341	0.00102658	0.00100622	0.00105854	0.00103766	0.00105428	0.000972939	0.00098167	0.000962553	0.00105522	0.00103767	0.00117815	0.000949713	0.00101297	0.00107545	0.00108089	0.00110943	0.00109127	0.00109334	0.00105682	0.00105282	0.00105249
Human Diseases	Infectious disease: bacterial	ko05120	Epithelial cell signaling in Helicobacter pylori infection	0.000278532	0.000295267	0.000333143	0.000272133	0.000423751	0.000379212	0.000267164	0.000244664	0.0005422	0.000624156	0.00108954	0.000329211	0.000371549	0.000689318	0.00162026	0.000417238	0.000422888	0.000486918	0.000501639	0.000558796	0.000441893	0.000434756	0.000356087	0.000366855
Human Diseases	Infectious disease: bacterial	ko05131	Shigellosis	8.0315e-08	2.00879e-07	1.25146e-07	1.70537e-07	1.44909e-07	1.30975e-07	1.32388e-07	9.43834e-08	1.09738e-07	7.39742e-08	2.77794e-07	6.34432e-07	4.06188e-07	3.42985e-07	9.64282e-08	2.66823e-07	7.57612e-07	6.93084e-07	1.08453e-07	7.03571e-08	9.57552e-08	2.16077e-07	9.82348e-08	2.77753e-07
Human Diseases	Infectious disease: bacterial	ko05132	Salmonella infection	0.000100912	9.44301e-05	0.000117064	6.19051e-05	0.00011517	0.000180639	8.17767e-05	0.000126073	9.58326e-05	9.63403e-05	0.000269853	9.22782e-05	0.00012597	0.000427186	0.00038409	8.96039e-05	0.000179874	0.000243838	0.000258952	0.000252725	0.000252271	0.00017957	0.000182535	0.000150748
Human Diseases	Infectious disease: bacterial	ko05133	Pertussis	0.000202934	0.000211664	0.000215833	0.000189856	0.000217721	0.000240773	0.000198256	0.000213225	0.000207618	0.000216503	0.000300889	0.000245054	0.000220281	0.000370383	0.000366897	0.000213452	0.000289296	0.000310234	0.000274115	0.000271231	0.000271023	0.000242952	0.000238423	0.000241034
Human Diseases	Infectious disease: bacterial	ko05134	Legionellosis	0.00295775	0.00297541	0.00291837	0.0030122	0.00291216	0.00285801	0.00298833	0.00293329	0.00292371	0.00293745	0.00266767	0.00298464	0.00292788	0.00260389	0.00252085	0.00296021	0.00285197	0.00275208	0.00273411	0.00273229	0.00278135	0.00283719	0.00283999	0.00288862
Human Diseases	Infectious disease: parasitic	ko05142	Chagas disease (American trypanosomiasis)	1.65772e-05	1.67457e-05	1.5882e-05	1.36136e-05	2.18365e-05	2.07104e-05	1.47958e-05	1.51103e-05	2.51728e-05	2.86361e-05	4.52321e-05	1.83924e-05	1.83397e-05	2.65075e-05	6.36171e-05	2.04896e-05	2.27686e-05	2.33439e-05	1.95508e-05	2.1801e-05	1.86308e-05	2.04534e-05	1.68796e-05	1.79131e-05
Human Diseases	Infectious disease: parasitic	ko05143	African trypanosomiasis	0.000100145	7.95924e-05	0.000104283	4.50855e-05	0.000181955	0.000157281	6.22962e-05	8.75749e-05	0.000215048	0.00020282	0.00047437	7.09999e-05	0.000109961	0.000183469	0.000645611	0.000130762	0.000162917	0.000216604	0.000155952	0.000186189	0.000136762	0.000163063	0.000146309	0.000123493
Human Diseases	Infectious disease: parasitic	ko05145	Toxoplasmosis	6.58664e-09	1.23408e-08	1.60046e-08	1.91564e-08	1.26206e-08	1.87902e-08	1.38492e-08	9.88581e-09	1.91189e-08	1.79439e-08	6.35513e-08	2.86532e-08	5.21051e-08	7.1991e-08	7.27249e-08	2.43198e-08	4.31578e-08	4.95291e-08	4.46255e-08	4.30566e-08	3.32067e-08	3.51262e-08	1.9776e-08	2.42091e-08
Human Diseases	Infectious disease: parasitic	ko05146	Amoebiasis	0.000117049	0.000125773	0.000119725	0.000133576	0.000114087	0.000119458	0.000125134	0.000119242	0.000120127	0.000133485	0.000130867	0.000133837	0.000134254	0.000186832	0.000159962	0.000127095	0.000123593	0.000126346	0.000135084	0.000133026	0.000149599	0.000122539	0.000126857	0.000129954
Human Diseases	Infectious disease: bacterial	ko05150	Staphylococcus aureus infection	0.00554361	0.00557668	0.00566792	0.00545278	0.00566098	0.00572487	0.00549588	0.0055962	0.00556508	0.00555123	0.00599577	0.00578266	0.00560372	0.00624243	0.00616669	0.00559479	0.00607908	0.00623443	0.00592734	0.00590226	0.00585416	0.0057723	0.00577379	0.00577773
Human Diseases	Infectious disease: bacterial	ko05152	Tuberculosis	0.00202729	0.0020399	0.00200247	0.00206866	0.00201589	0.00195522	0.00204696	0.00200146	0.00204138	0.00205326	0.00189999	0.0020505	0.00201224	0.0017575	0.00183072	0.00204743	0.00195944	0.00189309	0.00186428	0.00187201	0.00189481	0.00194804	0.00194617	0.0019829
Human Diseases	Infectious disease: viral	ko05160	Hepatitis C	6.38716e-07	6.09147e-07	7.01055e-07	5.39215e-07	7.50758e-07	7.6655e-07	5.86837e-07	6.33256e-07	7.89447e-07	7.91827e-07	1.2577e-06	5.93702e-07	6.64208e-07	9.65227e-07	1.59811e-06	6.75872e-07	7.56612e-07	8.56272e-07	8.10326e-07	8.39345e-07	7.79206e-07	7.66486e-07	7.30914e-07	6.89356e-07
Human Diseases	Infectious disease: viral	ko05162	Measles	6.38716e-07	6.09147e-07	7.01055e-07	5.39215e-07	7.50758e-07	7.6655e-07	5.86837e-07	6.33256e-07	7.89447e-07	7.91827e-07	1.2577e-06	5.93702e-07	6.64208e-07	9.65227e-07	1.59811e-06	6.75872e-07	7.56612e-07	8.56272e-07	8.10326e-07	8.39345e-07	7.79206e-07	7.66486e-07	7.30914e-07	6.89356e-07
Human Diseases	Infectious disease: viral	ko05164	Influenza A	8.82474e-07	8.83639e-07	9.59921e-07	7.2424e-07	1.34549e-06	1.18764e-06	7.72083e-07	7.61314e-07	1.65527e-06	1.7999e-06	3.30502e-06	1.00141e-06	1.08605e-06	1.71015e-06	4.74943e-06	1.24689e-06	1.34306e-06	1.49182e-06	1.20093e-06	1.36238e-06	1.14129e-06	1.23671e-06	1.00863e-06	1.05101e-06
Human Diseases	Infectious disease: viral	ko05168	Herpes simplex virus 1 infection	6.45303e-07	6.21488e-07	7.17059e-07	5.58371e-07	7.63379e-07	7.8534e-07	6.00686e-07	6.43142e-07	8.08566e-07	8.09771e-07	1.32125e-06	6.22355e-07	7.16313e-07	1.03722e-06	1.67083e-06	7.00192e-07	7.99769e-07	9.05801e-07	8.54952e-07	8.82402e-07	8.12412e-07	8.01612e-07	7.5069e-07	7.13565e-07
Human Diseases	Cancer: overview	ko05200	Pathways in cancer	0.000385777	0.000389665	0.000382441	0.000400417	0.000365924	0.000368179	0.000394144	0.000389535	0.00035514	0.000352911	0.000277774	0.000393008	0.000381748	0.000346758	0.000215677	0.000376679	0.000372071	0.000361234	0.000372109	0.00036402	0.0003717	0.00037043	0.000377175	0.000381486
Human Diseases	Cancer: overview	ko05203	Viral carcinogenesis	0.000326398	0.000330111	0.000322418	0.000337474	0.000320328	0.000310931	0.000332203	0.000322675	0.000323231	0.000326444	0.000285514	0.000333223	0.000324134	0.000277936	0.000265192	0.000329085	0.00031269	0.000298792	0.000298186	0.000297853	0.000302993	0.000310639	0.000310849	0.000318673
Human Diseases	Cancer: overview	ko05204	Chemical carcinogenesis	7.61442e-05	7.85701e-05	8.33706e-05	7.58498e-05	8.28182e-05	8.88095e-05	7.63562e-05	7.79262e-05	8.62776e-05	9.30963e-05	0.000127584	8.3304e-05	8.6335e-05	0.000140033	0.000165465	8.34492e-05	9.48096e-05	0.000103708	0.000109547	0.000110297	0.000104184	9.36464e-05	8.92367e-05	8.84166e-05
Human Diseases	Cancer: specific types	ko05210	Colorectal cancer	6.58664e-09	1.23408e-08	1.60046e-08	1.91564e-08	1.26206e-08	1.87902e-08	1.38492e-08	9.88581e-09	1.91189e-08	1.79439e-08	6.35513e-08	2.86532e-08	5.21051e-08	7.1991e-08	7.27249e-08	2.43198e-08	4.31578e-08	4.95291e-08	4.46255e-08	4.30566e-08	3.32067e-08	3.51262e-08	1.9776e-08	2.42091e-08
Human Diseases	Cancer: specific types	ko05211	Renal cell carcinoma	0.000376711	0.000381798	0.000370473	0.000395366	0.000355029	0.000350239	0.000387032	0.000377637	0.000346168	0.000344101	0.00024945	0.000386351	0.000370089	0.000302603	0.000175226	0.000368806	0.000354728	0.000336028	0.000339138	0.000331616	0.000345674	0.000349955	0.000358237	0.000366532
Human Diseases	Cancer: specific types	ko05215	Prostate cancer	4.48458e-06	4.39321e-06	7.20133e-06	2.80557e-06	4.92402e-06	1.1328e-05	3.98326e-06	6.82393e-06	3.70599e-06	5.24107e-06	1.81859e-05	3.97713e-06	7.36767e-06	3.64551e-05	2.98348e-05	4.13374e-06	1.08746e-05	1.61446e-05	2.55984e-05	2.48197e-05	1.93735e-05	1.38812e-05	1.17979e-05	9.50214e-06
Human Diseases	Cancer: specific types	ko05219	Bladder cancer	8.50149e-05	8.57708e-05	8.94488e-05	8.59954e-05	8.9917e-05	8.91295e-05	8.52277e-05	8.47726e-05	9.33941e-05	9.6395e-05	0.000111892	8.74055e-05	8.95992e-05	0.000105828	0.000128622	8.98817e-05	9.21624e-05	9.68103e-05	9.97567e-05	0.000100983	9.51404e-05	9.32681e-05	9.11674e-05	9.0652e-05
Human Diseases	Cancer: specific types	ko05220	Chronic myeloid leukemia	8.77284e-07	8.79175e-07	8.73814e-07	8.99409e-07	8.8721e-07	8.55412e-07	8.78615e-07	8.76698e-07	8.87472e-07	8.74778e-07	8.37065e-07	9.01955e-07	8.8779e-07	8.03362e-07	7.61835e-07	8.88924e-07	9.00109e-07	9.13565e-07	8.79696e-07	8.7835e-07	8.62058e-07	8.8242e-07	8.95574e-07	8.96677e-07
Human Diseases	Cancer: specific types	ko05222	Small cell lung cancer	3.70405e-06	2.59421e-06	3.89342e-06	1.34573e-06	5.08271e-06	5.75659e-06	2.24936e-06	4.1977e-06	4.37747e-06	2.6945e-06	9.30107e-06	1.77701e-06	3.40308e-06	6.89644e-06	9.85434e-06	2.84996e-06	5.56795e-06	8.14816e-06	6.49352e-06	6.70545e-06	5.78977e-06	5.71139e-06	6.24441e-06	4.55496e-06
Human Diseases	Immune disease	ko05322	Systemic lupus erythematosus	4.86248e-08	1.21618e-07	7.52374e-08	3.41847e-08	8.77314e-08	7.92958e-08	4.34206e-08	5.69037e-08	1.25421e-08	4.47859e-08	6.88438e-08	3.72647e-07	5.79353e-08	2.07652e-07	5.83801e-08	1.14481e-07	4.58678e-07	4.19611e-07	6.56605e-08	4.2596e-08	5.79727e-08	8.35901e-08	5.94739e-08	1.68159e-07
Human Diseases	Immune disease	ko05340	Primary immunodeficiency	0.000970334	0.000989462	0.00096402	0.00103488	0.000947661	0.000890657	0.00100262	0.000951472	0.00096756	0.000980752	0.000784372	0.0010079	0.000967344	0.000732503	0.000680868	0.000991735	0.000908404	0.000850484	0.000844983	0.00084388	0.00086388	0.000900697	0.000906784	0.000942884
Human Diseases	Cardiovascular disease	ko05410	Hypertrophic cardiomyopathy (HCM)	1.2634e-05	1.2463e-05	1.19078e-05	1.07297e-05	1.2009e-05	1.41475e-05	1.18846e-05	1.32812e-05	1.02849e-05	1.00142e-05	1.13658e-05	1.27924e-05	1.17445e-05	1.63356e-05	1.1164e-05	1.12937e-05	1.4574e-05	1.44994e-05	1.41347e-05	1.37248e-05	1.35402e-05	1.3222e-05	1.26822e-05	1.26004e-05
Human Diseases	Cardiovascular disease	ko05416	Viral myocarditis	6.58664e-09	1.23408e-08	1.60046e-08	1.91564e-08	1.26206e-08	1.87902e-08	1.38492e-08	9.88581e-09	1.91189e-08	1.79439e-08	6.35513e-08	2.86532e-08	5.21051e-08	7.1991e-08	7.27249e-08	2.43198e-08	4.31578e-08	4.95291e-08	4.46255e-08	4.30566e-08	3.32067e-08	3.51262e-08	1.9776e-08	2.42091e-08

## Sheet: Table S8
Grouping	KEGG Pathway	Enrichment Group	LDA	Kruskal-Wallis p-value
Control/Model/YXJYD	Purine metabolism	control	2.74767	0.000905068
	Cysteine and methionine metabolism	model	2.08372	0.0147354
	Valine, leucine and isoleucine biosynthesis	control	2.39577	0.000433985
	Histidine metabolism	model	2.59491	0.00370712
	Phenylalanine, tyrosine and tryptophan biosynthesis	control	2.36071	0.00447164
	Novobiocin biosynthesis	treatment	2.53127	0.0283678
	Phenazine biosynthesis	control	2.14765	0.00796658
	Naphthalene degradation	control	2.1258	0.00796658
	Glyoxylate and dicarboxylate metabolism	model	2.29399	0.0132667
	Aminoacyl-tRNA biosynthesis	model	2.52482	0.00757805
	2-Oxocarboxylic acid metabolism	model	2.0467	0.00333761
	Degradation of aromatic compounds	control	3.06829	0.0357037
	Biofilm formation - Pseudomonas aeruginosa	control	3.08848	0.0357037
	RNA polymerase	control	2.58729	0.0292317
	FoxO signaling pathway	treatment	2.1996	0.003544
	Peroxisome	model	2.35448	0.0223149
	PI3K-Akt signaling pathway	treatment	2.62556	0.00228246
	AMPK signaling pathway	control	2.55044	0.0027326
	NOD-like receptor signaling pathway	treatment	2.10801	0.00206526
	Thermogenesis	model	2.71211	0.00871683
	Glutamatergic synapse	model	2.41004	0.0181788
	GABAergic synapse	treatment	2.34907	0.00814786
	Adipocytokine signaling pathway	treatment	2.97457	0.00784797
	Epithelial cell signaling in Helicobacter pylori infection	control	2.53058	0.00564209
	Pertussis	control	2.36825	0.00645758
	Purine metabolism	treatment	2.81932	0.0201914
	Glutamatergic synapse	treatment	2.00653	0.0268497
	Adipocytokine signaling pathway	treatment	2.58726	0.00305035
	Glycolysis / Gluconeogenesis	control	2.50557	0.00417977
	Aminoacyl-tRNA biosynthesis	model	2.37162	0.0289409
	Glycerolipid metabolism	control	2.67021	0.0366076
	Glycosaminoglycan degradation	model	2.40993	0.00680566
	PPAR signaling pathway	control	2.00552	0.000711952
	Ubiquinone and other terpenoid-quinone biosynthesis	model	2.37262	0.0211207
	Vitamin B6 metabolism	treatment	2.22908	0.0171201
	Biosynthesis of amino acids	control	2.21157	0.0492917
	Carbon metabolism	control	2.22416	0.0259262
	Propanoate metabolism	control	2.14274	0.0027326
	Histidine metabolism	control	2.50839	0.0467706
	Glycine, serine and threonine metabolism	treatment	2.02286	0.00092798
	Naphthalene degradation	treatment	2.48131	0.000711952
	Thiamine metabolism	model	2.77516	0.0132667
	Amino sugar and nucleotide sugar metabolism	control	2.48533	0.0255402
	Lysosome	model	2.45783	0.0171201
	C5-Branched dibasic acid metabolism	control	3.11426	0.0380064
	Biosynthesis of antibiotics	treatment	2.17789	0.00927901
	Biosynthesis of ansamycins	treatment	2.31564	0.0115913
	NOD-like receptor signaling pathway	treatment	2.72595	0.0224268
	Sphingolipid metabolism	control	2.59932	0.00997673
	Quorum sensing	treatment	3.30526	0.0177743
	Various types of N-glycan biosynthesis	model	2.51486	0.00515649
	Phospholipase D signaling pathway	model	2.72345	0.0120644
	Other glycan degradation	model	2.77502	0.00214954
	Lysine biosynthesis	control	2.052	0.0296735
	2-Oxocarboxylic acid metabolism	control	2.59143	0.00982819
	Phenylpropanoid biosynthesis	control	2.45483	0.0296735
	Amino benzoate degradation	control	2.12016	0.0341327
	Glutathione metabolism	control	2.18172	0.00483197
	Fatty acid metabolism	control	2.90997	0.00814786
	Biosynthesis of vancomycin group antibiotics	control	2.81308	0.0296735
	African trypanosomiasis	control	2.79254	0.0388713
	Pyruvate metabolism	treatment	2.08835	0.00448283
	Mismatch repair	treatment	2.77947	0.00294543
	Glyoxylate and dicarboxylate metabolism	treatment	2.3319	0.00391672
	Steroid hormone biosynthesis	model	2.22107	0.00804664
Control/Model	Phenylalanine metabolism	model	2.24737	0.00162919
	Ribosome	control	2.85133	0.0032759
	Glycolysis_Gluconeogenesis	control	2.44641	0.00077753
	Aminoacyl_tRNA biosynthesis	control	3.11891	0.00162919
	Protein export	control	2.12159	0.00232209
	Glycerolipid metabolism	control	2.18972	0.00232209
	Ubiquinone and other terpenoid_quinone biosynthesis	model	2.30194	0.0032759
	p53 signaling pathway	model	2.06229	0.00113133
	Propanoate metabolism	model	2.1722	0.00232209
	Histidine metabolism	model	2.39669	0.00113133
	Citrate cycle_TCA cycle_	model	2.0849	0.00162919
	Glycerophospholipid metabolism	control	2.45536	0.00457444
	Valine_leucine and isoleucine degradation	model	2.3558	0.00113133
	Homologousre combination	control	2.78163	0.00232209
	Nitrogen metabolism	model	2.46156	0.00113133
	Pyrimidine metabolism	control	3.09255	0.00232209
	Lysine biosynthesis	control	2.25822	0.00162919
	Bacterial chemotaxis	model	2.50771	0.00113133
	Glutathione metabolism	control	2.42648	0.00113133
	Cell cycle_Caulobacter	control	2.24329	0.00457444
	Butanoatemetabolism	model	2.20321	0.00457444
	Pyruvate metabolism	model	2.25807	0.00632295
	Mismatch repair	control	2.78112	0.00232209
	Glyoxylate and dicarboxylate metabolism	model	2.37463	0.00113133
	Nonribosomal peptide structures	model	2.51347	0.00232209
	RNA degradation	control	2.37512	0.00232209
	Inositol phosphate metabolism	model	2.37473	0.00162919
	Flagellar assembly	model	2.73268	0.00162919
	Arginine and proline metabolism	model	2.66491	0.00113133
	Purine metabolism	control	3.07321	0.00232209
	Peptidoglycanbiosynthesis	control	2.40409	0.0032759
	Terpenoidbackbonebiosynthesis	control	2.24864	0.00457444
	Staphylococcusaureus infection	model	2.21083	0.00077753
	ABC transporters	control	2.61426	0.00865154
	Alanine_aspartate and glutamate metabolism	control	2.51806	0.0032759
	Oxidative phosphorylation	model	2.52617	0.0032759
	Fructose and mannose metabolism	model	2.44523	0.00865154
	Phenylalanine_tyrosine and tryptophan biosynthesis	model	2.73156	0.00232209
	Starch and sucrose metabolism	control	2.36107	0.00162919
	Two_component system	model	3.23898	0.00162919
	DNA replication	control	2.45913	0.00162919
	Porphyrin and chlorophyll metabolism	model	2.78628	0.00113133
	Valine_leucine and isoleucine biosynthesis	model	2.19427	0.0032759
	Galactose metabolism	control	2.36757	0.00077753
	Pentose and glucuronate inter conversions	model	2.48406	0.00632295
	Biosynthesis of siderophoregro upnon ribosomal peptides	model	2.155	0.00232209
	Bacterial invasion of epithelial cells	model	2.71409	0.00113133
	Nicotinate and nicotin amide metabolism	control	2.41954	0.00457444
	Nucleotide excision repair	control	2.75946	0.00162919
	Ascorbate and aldarate metabolism	model	2.3789	0.0032759
	Base excision repair	control	2.05061	0.00113133
	One carbon pool by folate	control	2.21744	0.0032759
Treatment/Model	Morphine addiction	model	2.2566	0.00457444
	Photosynthesis	model	2.07559	0.0032759
	GABAergic synapse	model	2.11667	0.00632295
	Phosphotransferase system_PTS_	model	2.7587	0.00162919
	Fructose and mannose metabolism	model	2.57904	0.0032759
	Pentosephosphate pathway	model	2.3392	0.0023221
	Cysteine and methionine metabolism	treatment	2.20132	0.0023221
	Pantothenate and CoA biosynthesis	treatment	2.06648	0.00077753
	Folate biosynthesis	treatment	2.40037	0.00865154

## Sheet: Table S9
Grouping	Enzyme	Enrichment Group	LDA	Kruskal-Wallis p-value
Control/Model/YXJYD	3.1....	Control	2.26836	0.0357037
	2.8.3.16	Control	2.13501	0.0467706
	2.4.1.8	Control	2.53625	0.000485661
	2.3.2..	Treatment group	2.62269	0.00628242
	2.3.2.3	Model	2.31692	0.0201914
	3.2.1..	Treatment group	2.20384	0.00547535
	2.4.1..	Control	2.21627	0.0220929
	3.2.2.1	Control	2.1582	0.00603608
	3.2.2..	Treatment group	2.11089	0.0184997
	3.2.1.86	Model	2.26598	0.00841701
	1.1.1.1	Treatment group	2.05503	0.00114483
	2.6.1.2	Treatment group	2.11119	0.00515649
	1.3.1..	Treatment group	2.05734	0.0151085
	1.2.1.16	Control	2.12627	0.00614264
	1.2.1.10	Control	2.0142	0.0391639
	2.6.1..	Control	2.44108	0.0154137
	5.2.1.8	Treatment group	2.07575	0.00441609
	2.7.4.8	Control	2.05145	0.00927901
	2.7.4.1	Control	2.16721	0.00183172
	2.7.2.1	Control	2.56821	0.00796658
	3.2.1.96	Treatment group	2.13105	0.00628242
	3.2.1.170	Model	2.04412	0.010358
	1.1.1.86	Treatment group	2.04085	0.00412784
	2.7.6.5	Control	2.13628	0.0296735
	2.7.6.1	Control	2.00731	0.0145161
	2.7.8..	Control	2.3421	0.0305009
	1.2.4.1	Model	2.2912	0.0388713
	1.2.4.4	Model	2.07239	0.00880443
	4.1.2.40	Treatment group	2.07267	0.032468
	5.4.99.23	Control	2.13463	0.00311976
	5.1.1.7	Control	2.04962	0.00614264
	3.4.24..	Control	2.64904	0.0406604
	6.4.1.1	Model	2.51444	0.0371608
	3.4.21..	Treatment group	2.4743	0.00214954
	3.5.4.28	Treatment group	2.41521	0.0270518
	1.11.1.6	Model	2.09494	0.0305009
	4.3.1.19	Treatment group	2.08845	0.00507972
	3.4.14.11	Control	2.37823	0.0165313
	3.6.1.40	Control	2.22669	0.000884932
	4.1.1.31	Control	2.44486	0.0296735
	4.1.1.36	Control	2.05695	0.0105408
	3.6.1.11	Control	2.22669	0.000884932
	3.5.4.31	Treatment group	2.41521	0.0270518
	3.4....	Control	2.95566	0.0224268
	1.17.4.2	Control	2.45615	0.0391639
	6.3.2.7	Treatment group	2.16409	0.00500409
	2.5.1.54	Treatment group	2.26866	0.00448283
	6.2.1.3	Treatment group	2.01411	0.00411754
	6.2.1.1	Model	2.06949	0.003544
	4.1.1.8	Control	2.15695	0.0467706
	4.1.3.6	Control	2.1312	0.000388779
	2.1.1.37	Treatment group	2.06122	0.0184997
	3.6.3..	Control	2.53494	0.000520875
	6.1.1.14	Control	2.16451	0.0201914
	1.4.1.13	Model	2.49824	0.0107807
	1.4.1.14	Model	2.49824	0.0107807
	3.5.1.4	Treatment group	2.07692	0.00603608
	2.1.1.72	Control	2.41298	0.0181788
	3.5.1..	Model	2.04955	0.00865169
	2.4.2.1	Treatment group	2.26395	0.00513077
	2.4.2.9	Control	2.06948	0.0216554
	4.1.1.17	Control	2.50248	0.0341327
	3.2.1.1	Treatment group	2.20664	0.02851
	2.1.1..	Treatment group	2.27483	0.00232857
	6.1.1.20	Control	2.15199	0.0296735
	3.2.1.22	Control	2.27257	0.00224848
	3.2.1.23	Control	2.62552	0.0239928
	3.2.1.20	Control	2.67316	0.00706572
	3.2.1.21	Model	2.29361	0.0221482
	3.2.1.26	Control	2.11172	0.0132999
	3.2.1.24	Treatment group	2.46025	0.00884856
	2.3.2.10	Treatment group	2.06473	0.00632971
	3.6.4.12	Control	2.95514	0.00405624
	6.3.4.3	Control	2.26641	0.0464212
	4.2.1.35	Treatment group	2.17508	0.000577097
	4.2.1.33	Treatment group	2.17508	0.000577097
	3.1.21.3	Control	2.60304	0.0057417
	4.1.2.13	Model	2.05181	0.00279479
	3.2....	Control	2.05832	0.00115057
	2.7.1.15	Control	2.25191	0.00422177
	3.4.11.2	Control	2.44415	0.00757805
	3.4.11.5	Control	2.47274	0.00333761
	3.4.11.4	Control	2.29145	0.0388713
	3.4.11.7	Treatment group	2.07241	0.00547535
	2.6.1.85	Treatment group	2.22616	0.00405624
	3.1.4.46	Control	2.16054	0.000865243
	2.3.1..	Model	2.10008	0.00706572
	2.3.3.1	Treatment group	2.03188	0.00238156
	2.6.1.66	Treatment group	2.1213	0.00524752
	3.4.13..	Treatment group	2.06834	0.00767336
	4.2.1.11	Control	2.26815	0.00655518
	3.4.11..	Treatment group	2.32276	0.00757805
	2.4.1.52	Model	2.2954	0.00717251
	3.4.24.13	Treatment group	2.03214	0.0323869
	3.4.16.4	Treatment group	2.04902	0.0132667
	2.1.1.191	Treatment group	2.19275	0.00724459
	2.1.1.192	Treatment group	2.17979	0.00513077
	3.5.1.28	Model	2.51728	0.00645758
	4.2.1.20	Model	2.09281	0.0245388
	4.1.3.27	Treatment group	2.16726	0.00784797
	1.1.1.274	Control	2.14037	0.00196453
	6.3.2.12	Control	2.00923	0.0034221
	6.3.2.13	Control	2.53067	0.00982819
	6.3.2.17	Control	2.00923	0.0034221
	2.7.1.12	Control	2.30138	0.0131675
	1.2.7..	Model	2.24757	0.00591656
	1.2.1.3	Model	2.02659	0.00767336
	1.2.3.3	Control	2.42641	0.00114483
	2.3.1.12	Model	2.13009	0.0268497
	2.3.3.13	Treatment group	2.18244	0.00327152
	2.5.1.19	Treatment group	2.16654	0.00513077
	4.1.3.38	Treatment group	2.17196	0.00430706
	3.1.3.48	Control	2.59777	0.0184997
	4.1.1.49	Control	2.24811	0.0161231
	2.7.7.7	Control	2.9044	0.0427451
	2.7.7.6	Control	2.53418	0.0296735
	2.7.7.8	Treatment group	2.48691	0.00515649
	2.7.3.9	Control	2.03704	0.0357037
	6.1.1.9	Control	2.02761	0.0268497
	2.1.1.79	Control	2.28345	0.00117088
	6.1.1.7	Control	2.0342	0.0296735
	2.7.9.1	Model	2.10386	0.00939573
	3.2.1.18	Treatment group	2.18252	0.0298969
	3.2.1.14	Model	2.01662	0.00471267
	1.15.1.1	Treatment group	2.0335	0.00359756
	1.1.1..	Model	2.02808	0.0307305
	3.2.1.10	Model	2.21949	0.00645758
	1.2.1.41	Treatment group	2.04745	0.0341327
	1.4.4.2	Model	2.0473	0.00675481
	1.1.1.100	Model	2.10715	0.0440469
	2.3.1.79	Control	2.12602	0.00145536
	1.4.1.4	Treatment group	2.07004	0.0421087
	1.1.1.44	Control	2.0709	0.000557248
	1.1.1.49	Control	2.02067	0.0121552
	3.5.1.24	Control	2.36626	0.00500409
	6.3.1.1	Control	2.08768	0.0239928
	5.4.2.7	Treatment group	2.06879	0.0107538
	6.3.5.3	Treatment group	2.06947	0.00975476
	6.3.5.7	Control	2.09684	0.0221482
	6.3.5.6	Control	2.09684	0.0221482
	6.3.5.5	Control	2.96186	0.0198908
	6.3.5.4	Control	2.42703	0.00750264
	1.8.1.4	Model	2.28262	0.0128746
	1.11.1.1	Control	2.07519	0.00067723
	2.3.1.54	Treatment group	2.64668	0.0367911
	4.1.2.9	Control	2.61222	0.00422177
	3.4.22.40	Control	2.52634	0.0132667
	1.10.3..	Model	2.25253	0.00305035
	3.6.4..	Control	2.67604	0.0391639
	5.1.1.13	Control	2.09312	0.0108618
	3.1.1..	Treatment group	2.2967	0.0187324
	3.1.3.11	Model	2.1881	0.0289409
	1.3.1.12	Treatment group	2.0062	0.0127784
	3.2.1.41	Treatment group	2.32374	0.00224848
	4.2.1.9	Treatment group	2.28887	0.00287271
	4.2.1.2	Control	2.23153	0.0189207
	4.2.1.3	Treatment group	2.29275	0.00255424
	5.3.1.26	Treatment group	2.05119	0.0347353
	4.2.3.4	Treatment group	2.11369	0.00739094
	4.2.3.5	Treatment group	2.16129	0.00412784
	2.7.13.3	Treatment group	3.0306	0.00564209
	5.1.3.14	Control	2.01499	0.0406604
	1.1.1.25	Model	2.09248	0.0391639
	1.1.1.27	Control	2.46237	0.0120644
	1.1.1.22	Treatment group	2.08666	0.00925585
	2.2.1.1	Treatment group	2.60295	0.0139818
	2.2.1.6	Treatment group	2.29752	0.00939573
	1.1.1.28	Control	2.43725	0.011026
	3.2.1.122	Control	2.09686	0.00214954
Control/Model	3.4.24..	Control	2.64314	0.0032759
	6.4.1.1	Model	2.50525	0.00457444
	3.4....	Control	2.84664	0.0032759
	3.2.1.23	Control	2.61925	0.00113133
	3.6.4.12	Control	2.6665	0.0023221
	3.1.21.3	Control	2.5828	0.0032759
	3.5.1.28	Model	2.51385	0.00113133
	2.7.7.7	Control	2.89502	0.0032759
	2.7.7.6	Control	2.52732	0.0023221
	6.3.5.5	Control	2.90927	0.00162919
	3.6.4..	Control	2.66588	0.0032759
	2.7.13.3	Model	2.91364	0.00113133
Model/Treatment	3.2.1.86	Model	2.21267	0.00457444
	4.1.2.13	Model	2.00683	0.00865154
	2.4.1.52	Model	2.26759	0.0023221
	1.2.3.3	Model	2.38948	0.00077753
	3.2.1.10	Model	2.16741	0.00632295
	1.1.1.44	Model	2.02241	0.00077753
	3.2.1.41	Treatment group	2.27291	0.0032759

## Sheet: Table S10
	Mean Decrease Accuracy
Biosynthesis of unsaturated fatty acids	4.88781
Glyoxylate and dicarboxylate metabolism	3.71468
Linoleic acid metabolism	3.65977
Tyrosine metabolism	3.50861
Starch and sucrose metabolism	2.83636
Glycerolipid metabolism	2.74294
Steroid biosynthesis	2.72484
Ether lipid metabolism	2.71125
Inositol phosphate metabolism	2.66676
Photosynthesis antenna proteins	2.55433
Synthesis and degradation of ketone bodies	2.55427
Steroid hormone biosynthesis	2.53881
Secondary bile acid biosynthesis	2.41157
Citrate cycle TCA cycle	2.22806
alpha Linolenic acid metabolism	2.20557
Nitrogen metabolism	2.11337
Arginine and proline metabolism	2.07741
Propanoate metabolism	1.99567
Lysine degradation	1.97417
Carbon fixation in photosynthetic organisms	1.91338
Valine leucine and isoleucine biosynthesis	1.87579
Phenylalanine tyrosine and tryptophan biosynthesis	1.87456
Sphingolipid metabolism	1.73727
Fatty acid degradation	1.71351
Valine leucine and isoleucine degradation	1.71059
Glycerophospholipid metabolism	1.70743
Phenylalanine metabolism	1.69975
Primary bile acid biosynthesis	1.69732
Amino sugar and nucleotide sugar metabolism	1.40275
C5 Branched dibasic acid metabolism	1.40275
Photosynthesis	1.38062
Arachidonic acid metabolism	1.38062
Glycolysis Gluconeogenesis	1.001
Pentose phosphate pathway	1.001
Oxidative phosphorylation	1.001
Fatty acid elongation	0.951794
Pyruvate metabolism	0.885679
Histidine metabolism	0.859028
Glycine serine and threonine metabolism	0.582807
Alanine aspartate and glutamate metabolism	0.200008
Ascorbate and aldarate metabolism	0
Tryptophan metabolism	0
Butanoate metabolism	0
Methane metabolism	0
Fructose and mannose metabolism	-0.108467
Lysine biosynthesis	-0.277371
Galactose metabolism	-0.420186
Cysteine and methionine metabolism	-1.001
Carbon fixation pathways in prokaryotes	-1.001
Sulfur metabolism	-1.001
Pentose and glucuronate interconversions	-1.40835
Fatty acid biosynthesis	-2.12615
